# Supplementary material for: Peperomin E and its synthetic amino derivatives: potent agents targeting leukaemia stem cells
Source: Royal Society of Chemistry journal article supplement (doi:10.1039/c7ra09928b), 2017-01-01
Supplement: c7ra09928b1.pdf [file c7ra09928b1.pdf]

## ***Supplementary Information II (Figures)***

### **Figure Captions**

**Figure S1.** <sup>1</sup>H-NMR (1-a), <sup>13</sup>C-NMR (1-b) and HR-ESI-MS (1-c) spectra of compound 2

**Figure S2.** <sup>1</sup>H-NMR (2-a), <sup>13</sup>C-NMR (2-b) and HR-ESI-MS (2-c) spectra of compound 3

**Figure S3.** <sup>1</sup>H-NMR (3-a), <sup>13</sup>C-NMR (3-b) and HR-ESI-MS (3-c) spectra of compound 4

**Figure S4.** <sup>1</sup>H-NMR (4-a), <sup>13</sup>C-NMR (4-b) and HR-ESI-MS (4-c) spectra of compound 5

**Figure S5.** <sup>1</sup>H-NMR (5-a), <sup>13</sup>C-NMR (5-b) and HR-ESI-MS (5-c) spectra of compound 6

**Figure S6.** <sup>1</sup>H-NMR (6-a), <sup>13</sup>C-NMR (6-b) and HR-ESI-MS (6-c) spectra of compound 7

**Figure S7.** <sup>1</sup>H-NMR (7-a), <sup>13</sup>C-NMR (7-b) and HR-ESI-MS (7-c) spectra of compound 8

**Figure S8.** <sup>1</sup>H-NMR (8-a), <sup>13</sup>C-NMR (8-b) and HR-ESI-MS (8-c) spectra of compound 9

**Figure S9.** <sup>1</sup>H-NMR (9-a), <sup>13</sup>C-NMR (9-b) and HR-ESI-MS (9-c) spectra of compound 10

**Figure S10.** <sup>1</sup>H-NMR (10-a), <sup>13</sup>C-NMR (10-b) and HR-ESI-MS (10-c) spectra of compound 11

**Figure S11.** <sup>1</sup>H-NMR (11-a), <sup>13</sup>C-NMR (11-b) and HR-ESI-MS (11-c) spectra of compound 12

**Figure S12.** <sup>1</sup>H-NMR (12-a), <sup>13</sup>C-NMR (12-b) and HR-ESI-MS (12-c) spectra of compound 13

**Figure S13.** <sup>1</sup>H-NMR (13-a), <sup>13</sup>C-NMR (13-b) and HR-ESI-MS (13-c) spectra of compound 14

**Figure S14.** <sup>1</sup>H-NMR (14-a), <sup>13</sup>C-NMR (14-b) and HR-ESI-MS (14-c) spectra of compound 15

**Figure S15.** <sup>1</sup>H-NMR (15-a), <sup>13</sup>C-NMR (15-b) and HR-ESI-MS (15-c) spectra of compound 16

**Figure S16.** <sup>1</sup>H-NMR (16-a), <sup>13</sup>C-NMR (16-b) and HR-ESI-MS (16-c) spectra of compound 17

**Figure S17.** <sup>1</sup>H-NMR (17-a), <sup>13</sup>C-NMR (17-b) and HR-ESI-MS (17-c) spectra of compound 18

**Figure S18.** <sup>1</sup>H-NMR (18-a), <sup>13</sup>C-NMR (18-b) and HR-ESI-MS (18-c) spectra of compound 19

**Figure S19.** Purity test of compound 2 by HPLC ( $\lambda=210$  nm)

**Figure S20.** Purity test of compound 3 by HPLC ( $\lambda=210$  nm)

**Figure S21.** Purity test of compound 4 by HPLC ( $\lambda=210$  nm)

**Figure S22.** Purity test of compound 5 by HPLC ( $\lambda=210$  nm)

**Figure S23.** Purity test of compound 6 by HPLC ( $\lambda=210$  nm)

**Figure S24.** Purity test of compound 7 by HPLC ( $\lambda=210$  nm)

**Figure S25.** Purity test of compound 8 by HPLC ( $\lambda=210$  nm)

**Figure S26.** Purity test of compound 9 by HPLC ( $\lambda=210$  nm)

**Figure S27.** Purity test of compound 10 by HPLC ( $\lambda=210$  nm)

**Figure S28.** Purity test of compound 11 by HPLC ( $\lambda=210$  nm)

**Figure S29.** Purity test of compound 12 by HPLC ( $\lambda=210$  nm)

**Figure S30.** Purity test of compound 13 by HPLC ( $\lambda=210$  nm)

**Figure S31.** Purity test of compound 14 by HPLC ( $\lambda=210$  nm)

**Figure S32.** Purity test of compound 15 by HPLC ( $\lambda=210$  nm)

**Figure S33.** Purity test of compound 16 by HPLC ( $\lambda=210$  nm)

**Figure S34.** Purity test of compound 17 by HPLC ( $\lambda=210$  nm)

**Figure S35.** Purity test of compound 18 by HPLC ( $\lambda=210$  nm)

**Figure S36.** Purity test of compound 19 by HPLC ( $\lambda=210$  nm)

1-a

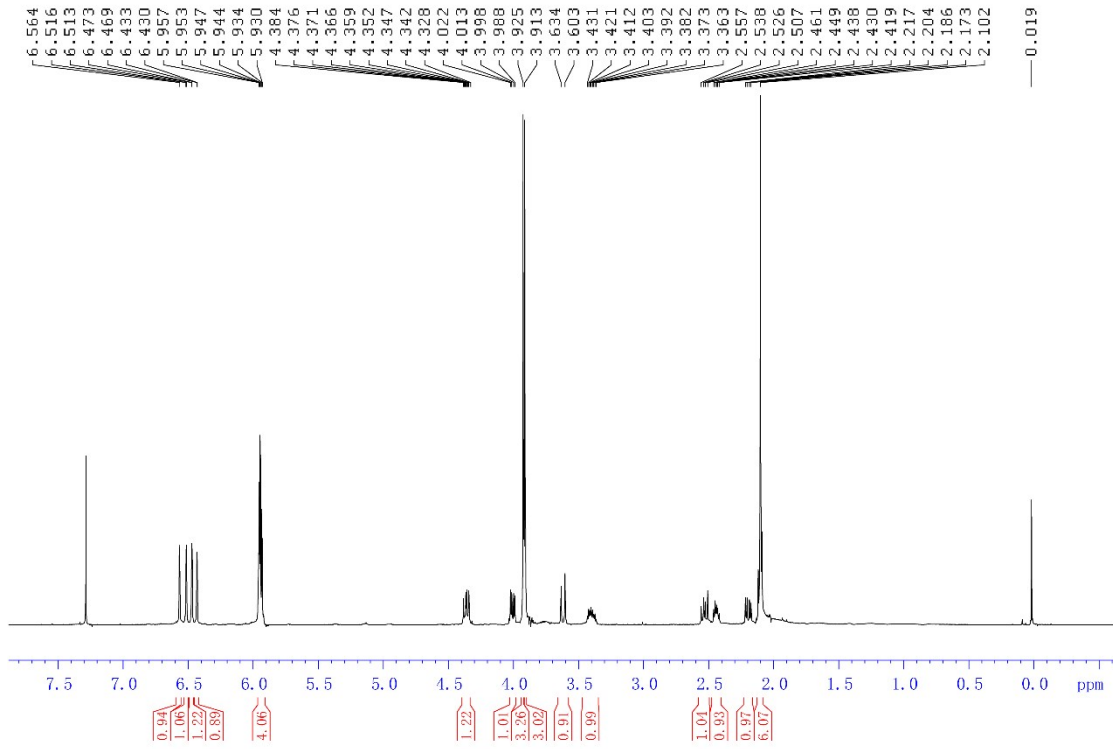

1-b

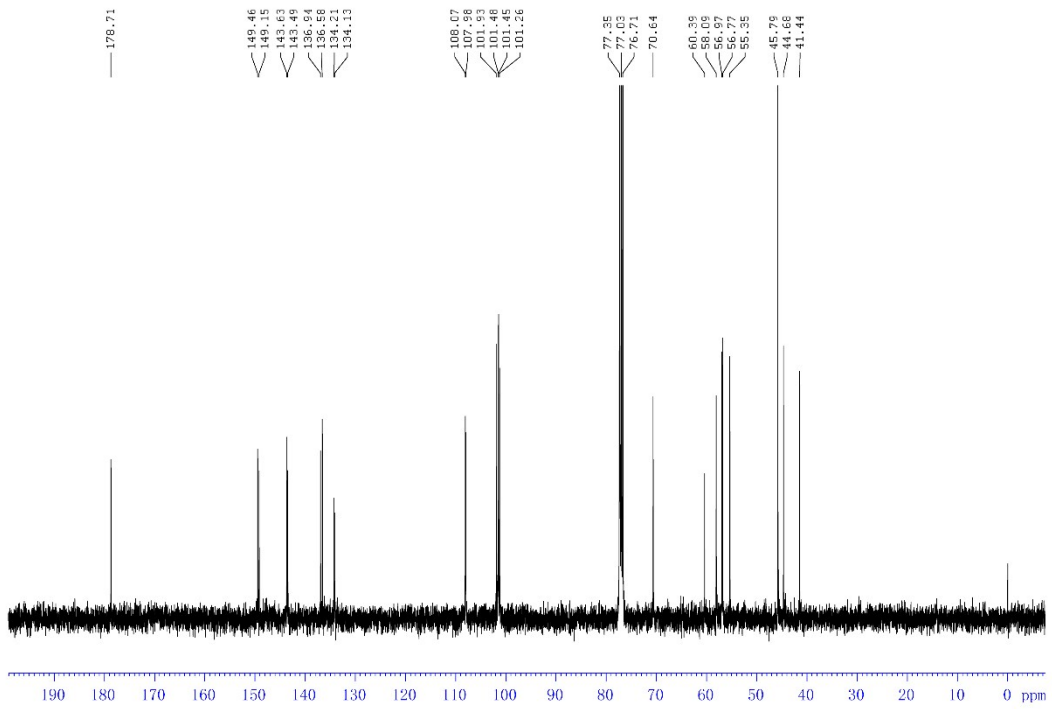

### 1-c

Spectrum from DataSET11.wiff (sample 1) - pepAME-1, Experiment 1, +TOF MS (100 - 1000)

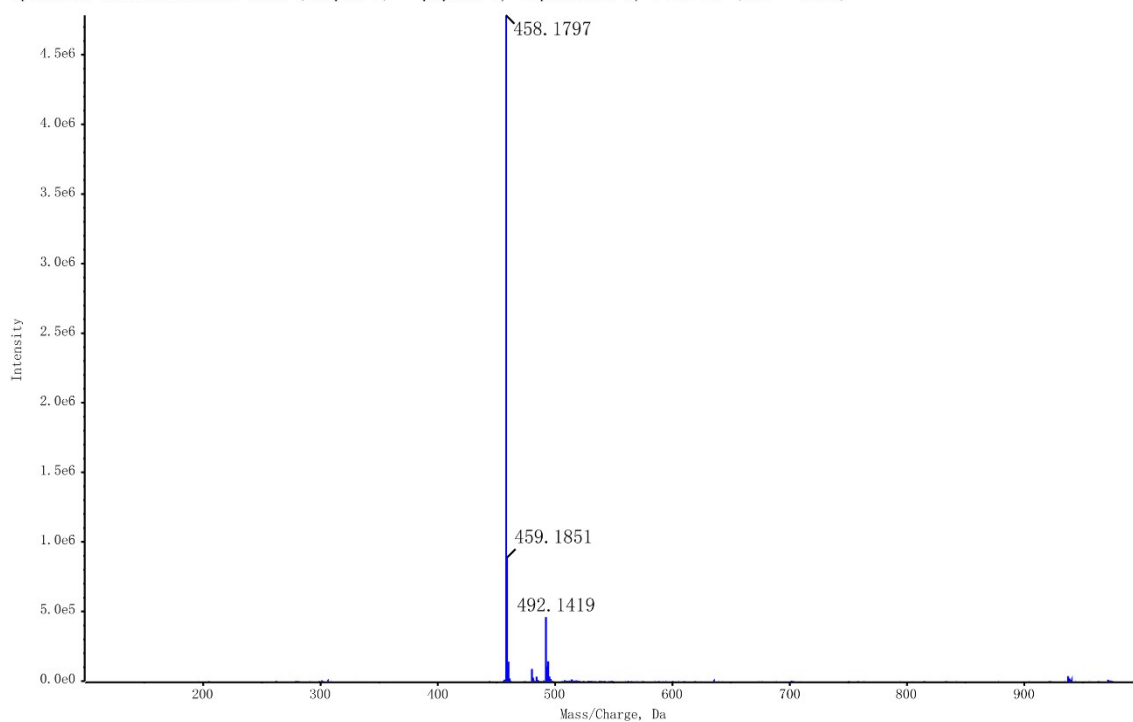

**Figure S1.**  $^1\text{H-NMR}$  (1-a),  $^{13}\text{C-NMR}$  (1-b) and HR-ESI-MS (1-c) spectra of compound 2

### 2-a

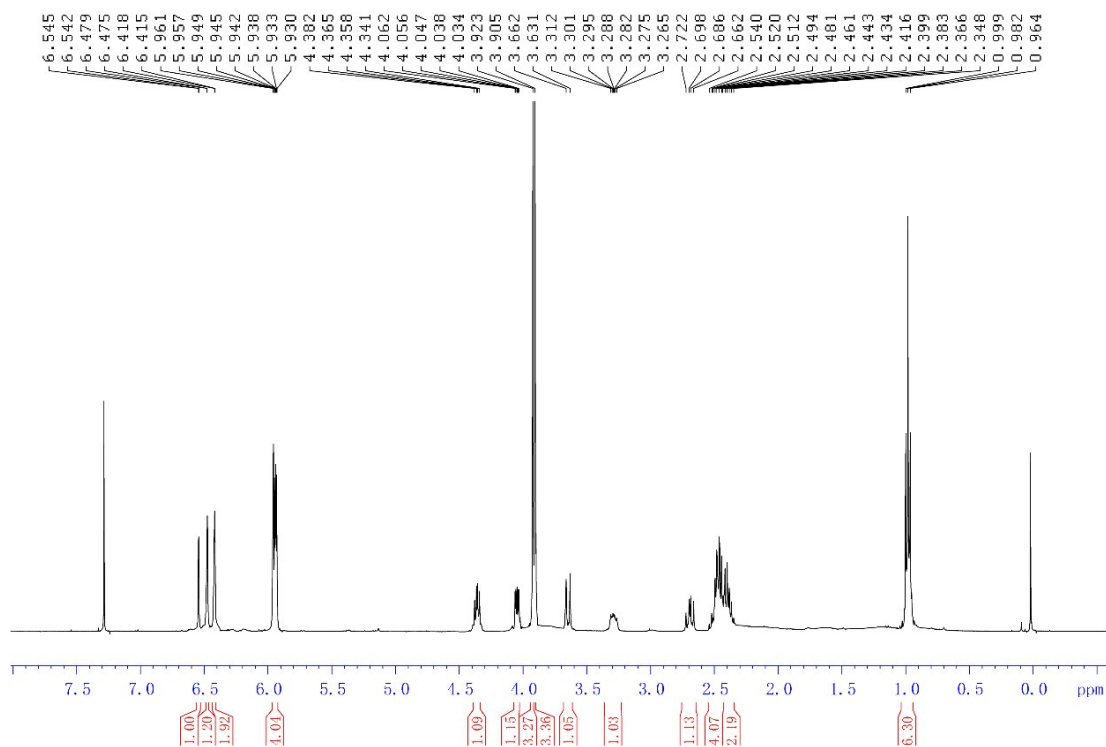

2-b

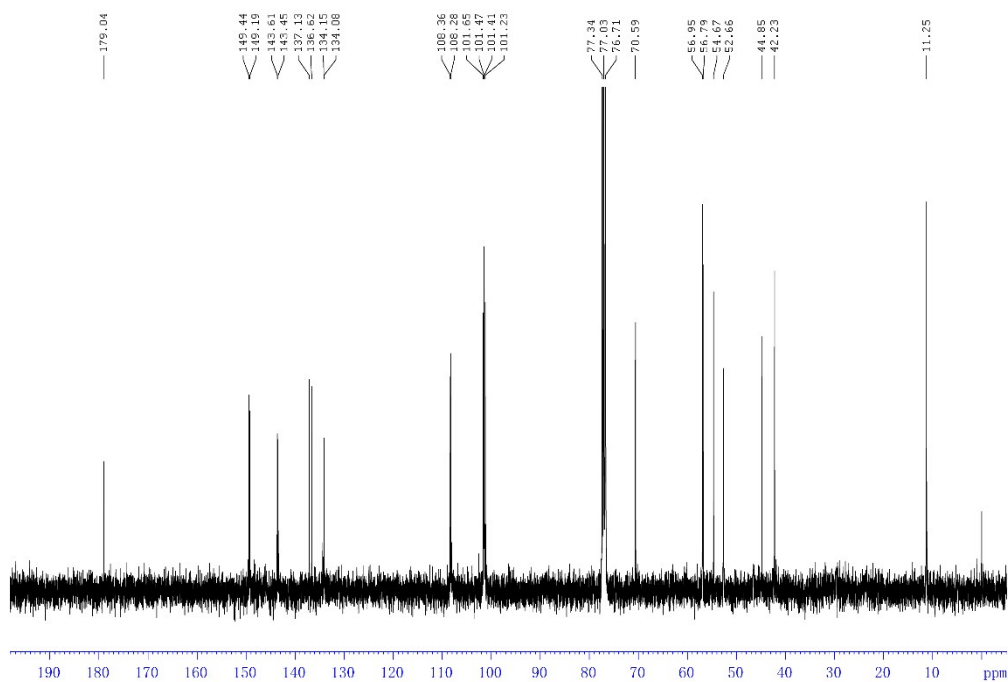

2-c

Spectrum from DataSET12.wiff (sample 2) - pepAME-2, Experiment1, +TOF MS (100 - 1000)

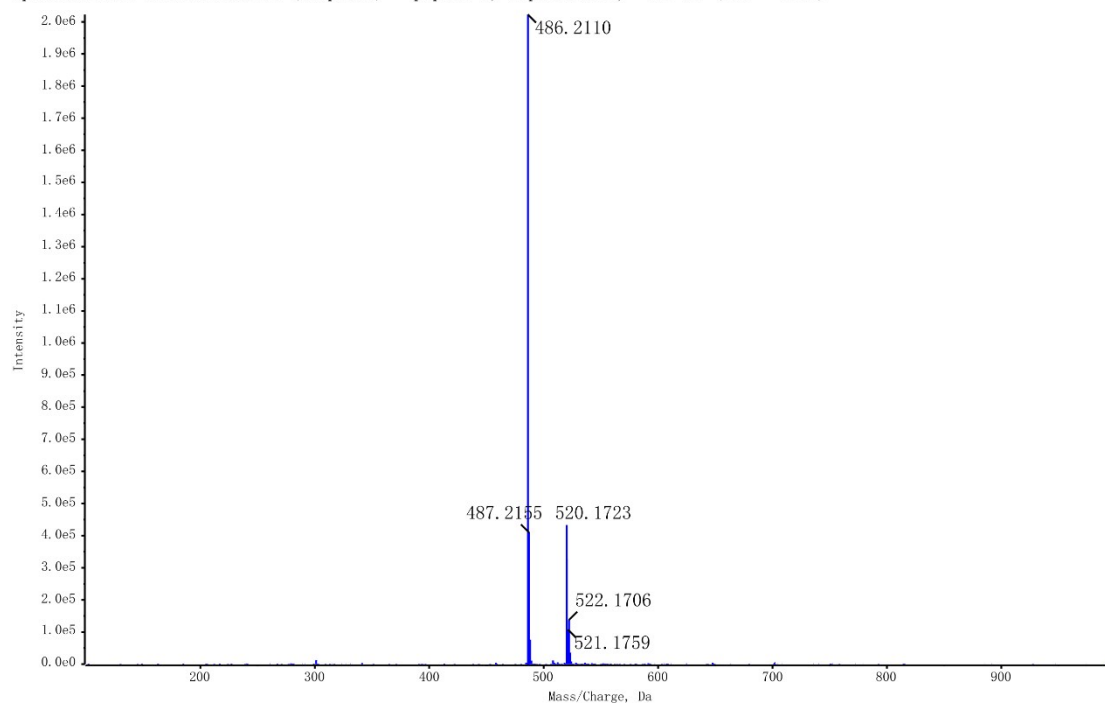

**Figure S2.** <sup>1</sup>H-NMR (2-a), <sup>13</sup>C-NMR (2-b) and HR-ESI-MS (2-c) spectra of compound 3

3-a

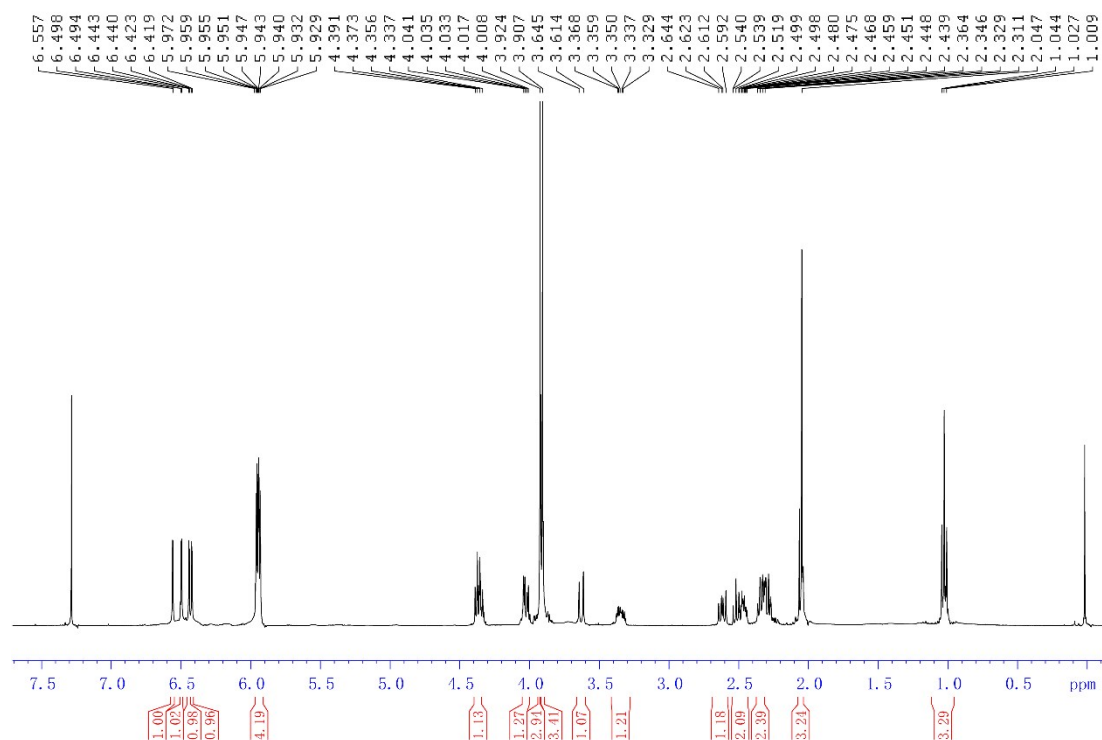

3-b

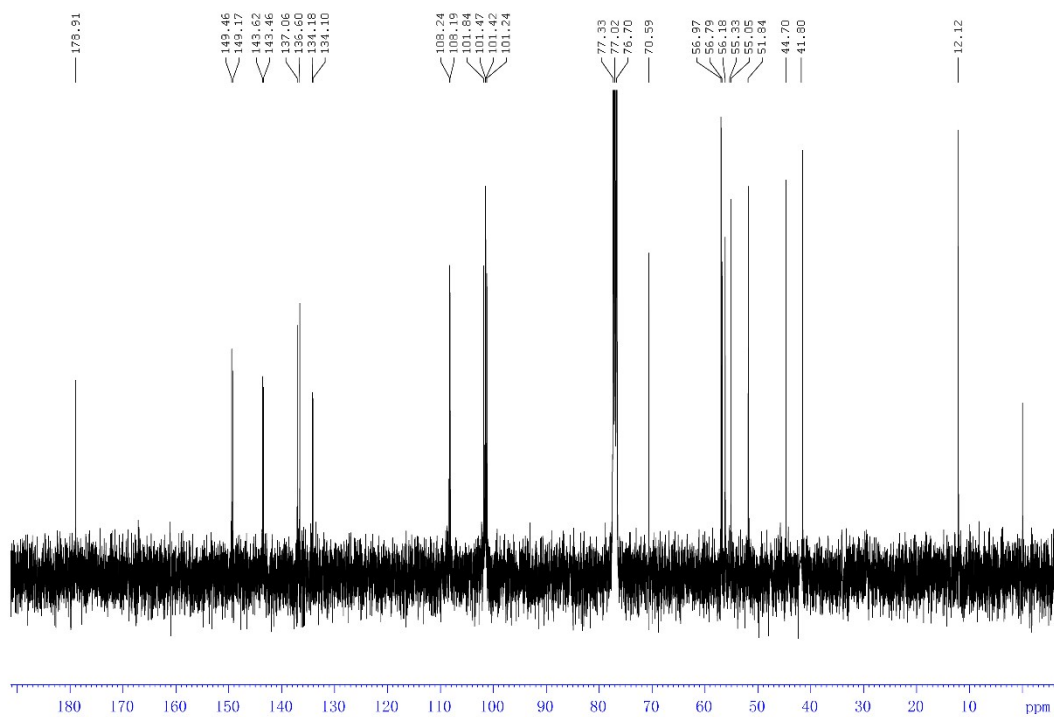

### 3-c

Spectrum from DataSET110.wiff (sample 3) - pepAME-3, Experiment 1, +TOF MS (100 - 1000)

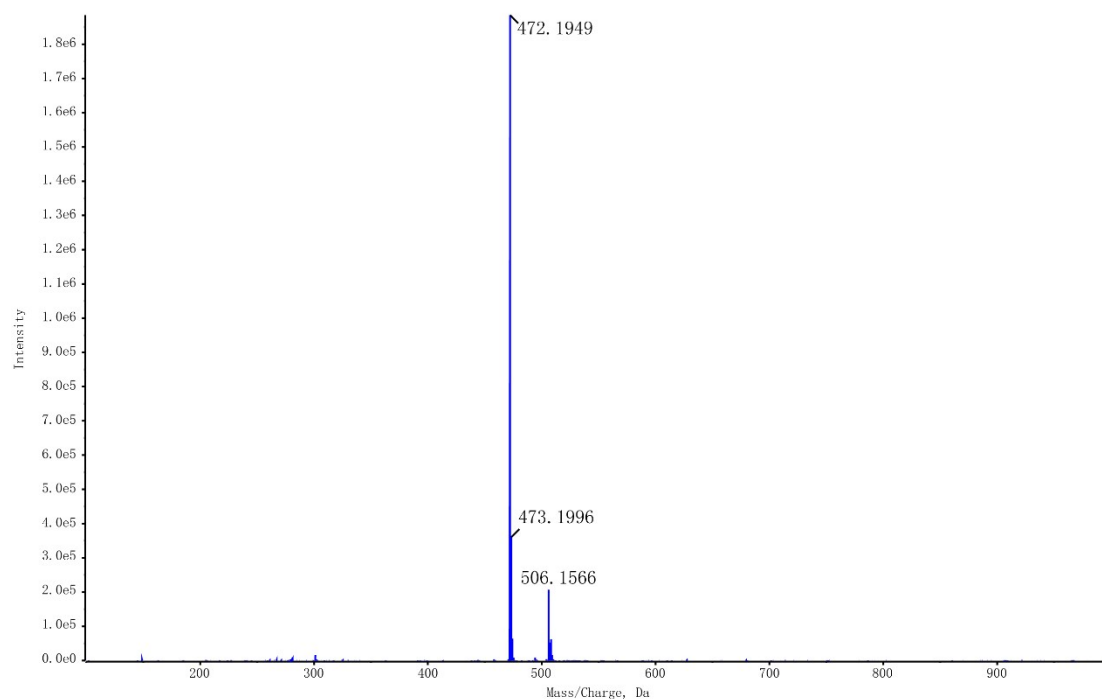

**Figure S3.**  $^1\text{H-NMR}$  (3-a),  $^{13}\text{C-NMR}$  (3-b) and HR-ESI-MS (3-c) spectra of compound 4

### 4-a

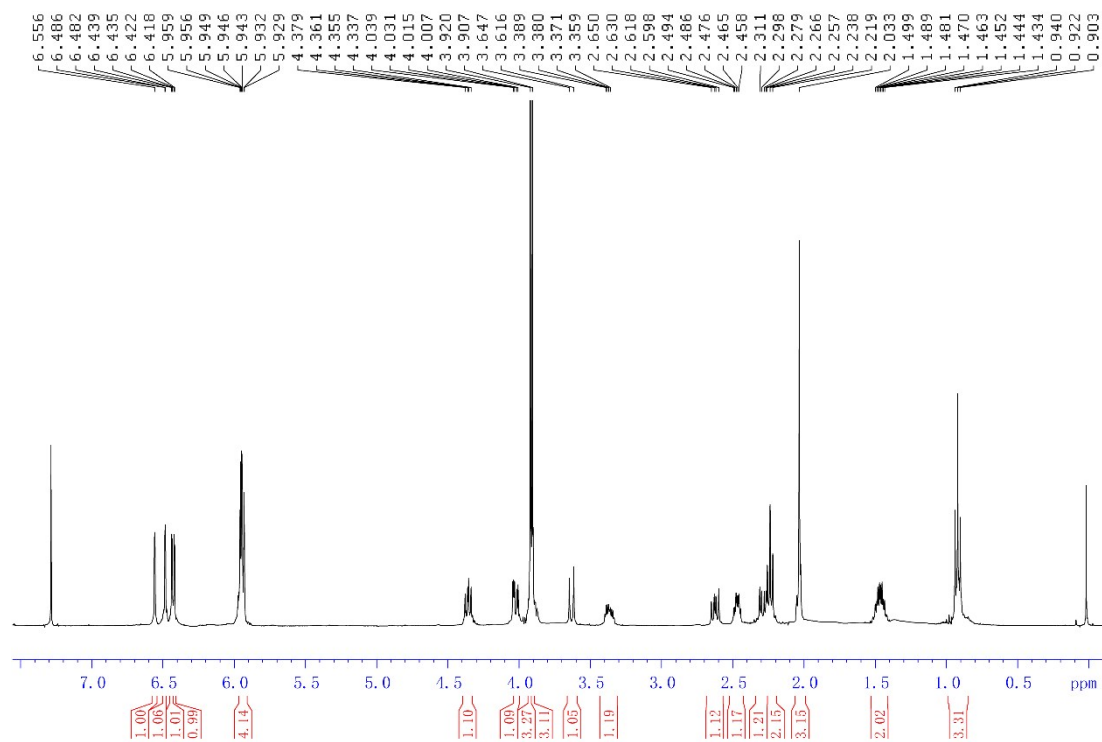

4-b

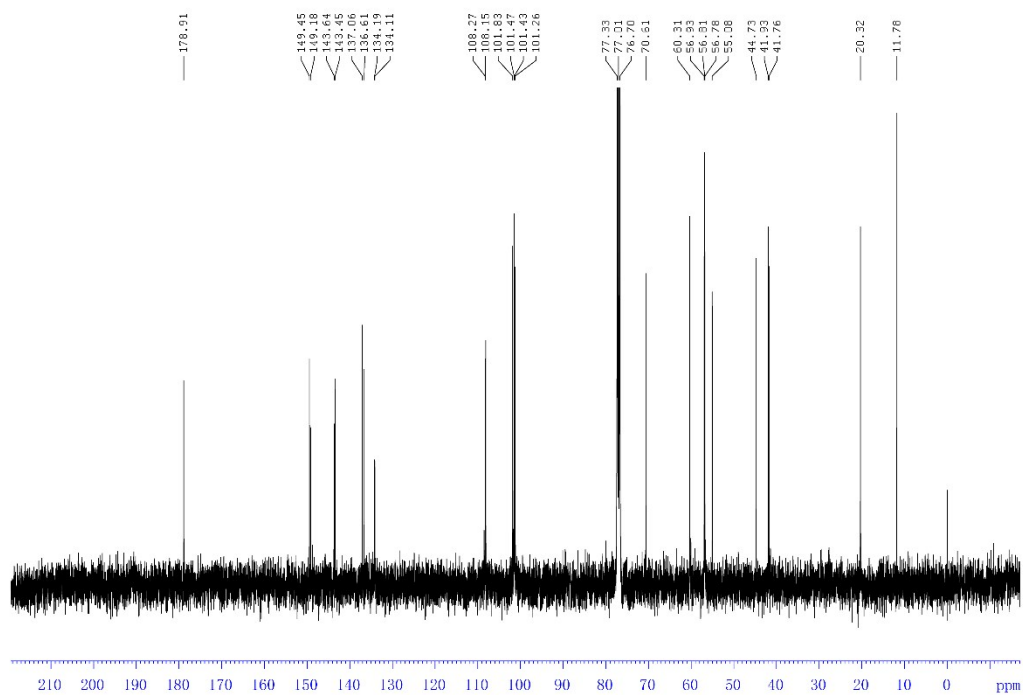

4-c

Spectrum from DataSET113.wiff (sample 4) - pepAME-4, Experiment 1, +TOF MS (100 - 1000)

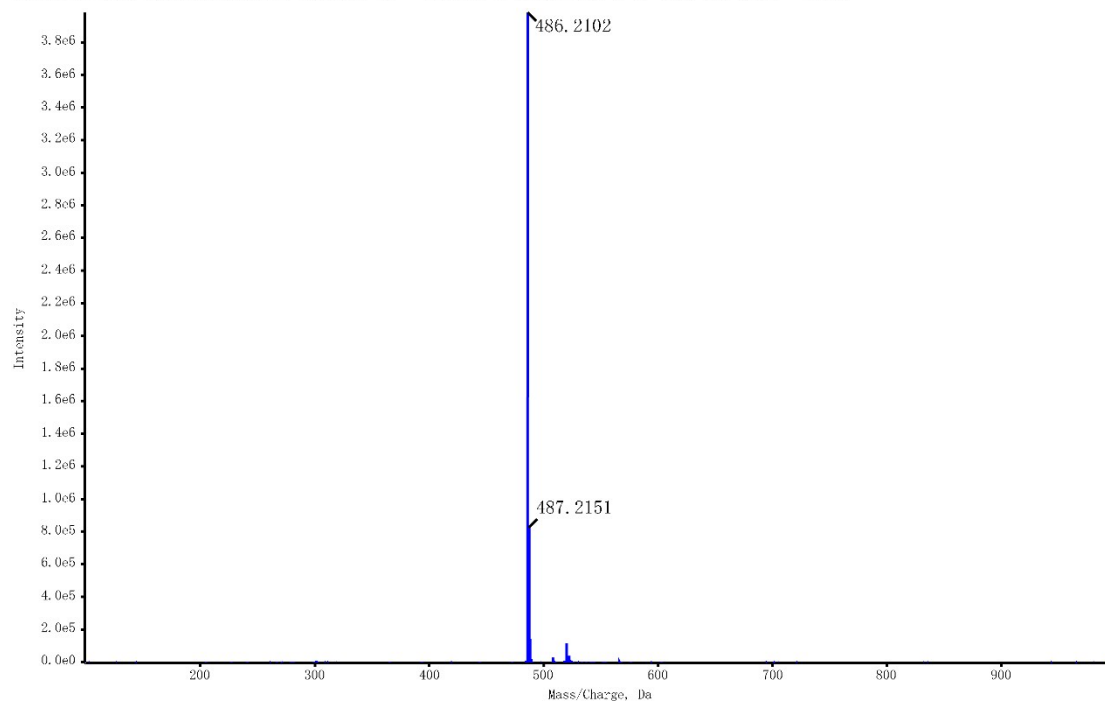

**Figure S4.** <sup>1</sup>H-NMR (4-a), <sup>13</sup>C-NMR (4-b) and HR-ESI-MS (4-c) spectra of compound 5

5-a

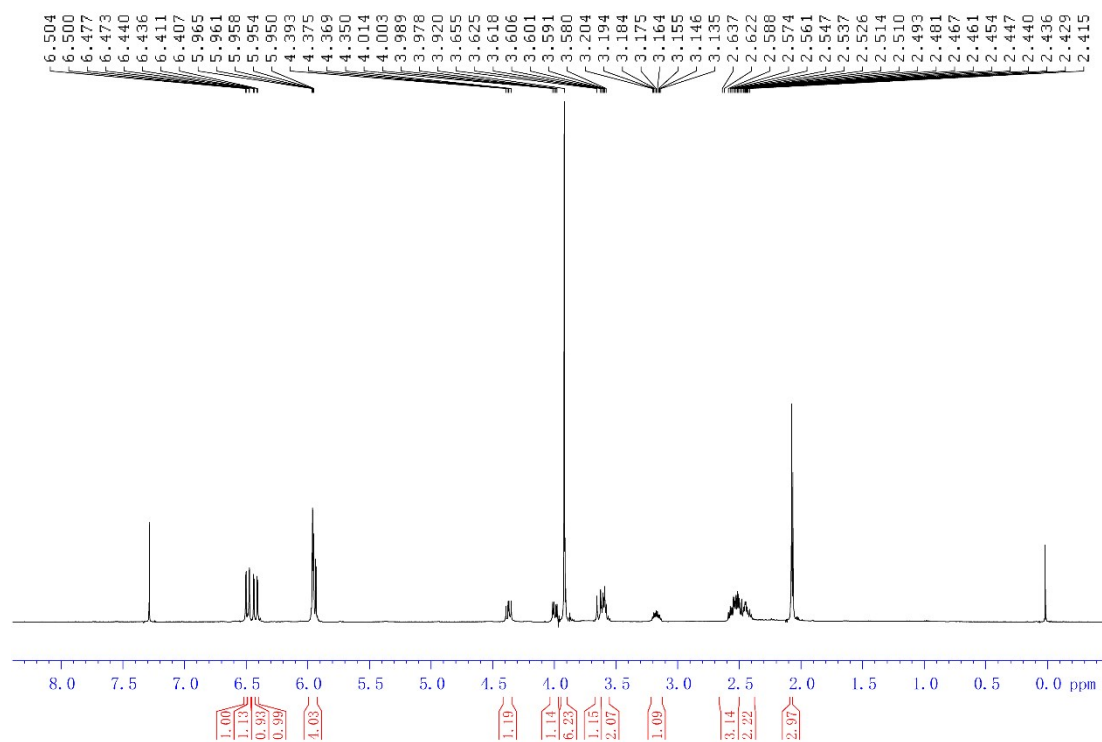

5-b

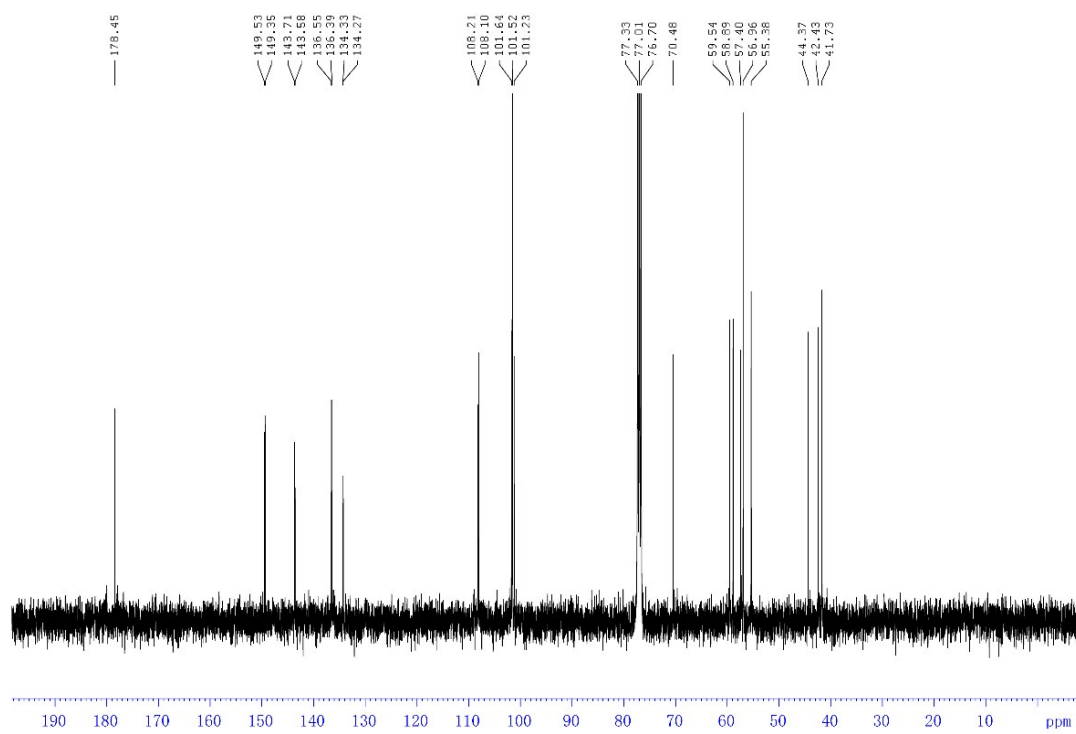



5-c

Spectrum from DataSET17.wiff (sample 5) - pepAME-5, Experiment1, +TOF MS (100 - 1000)

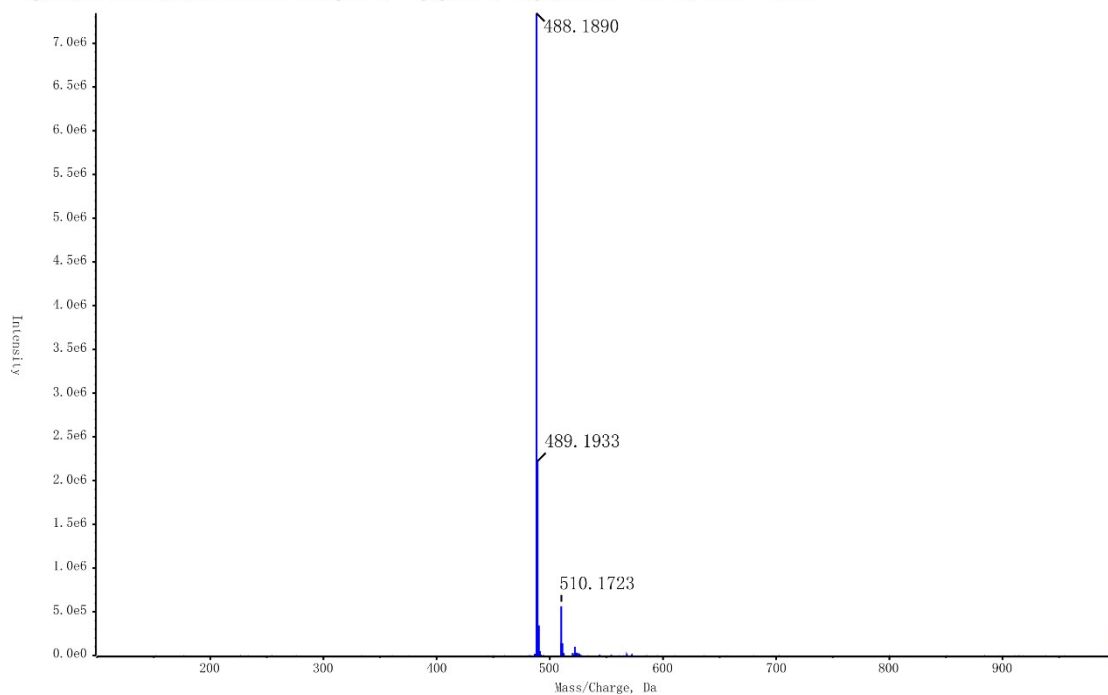

Figure S5. <sup>1</sup>H-NMR (5-a), <sup>13</sup>C-NMR (5-b) and HR-ESI-MS (5-c) spectra of compound 6

6-a

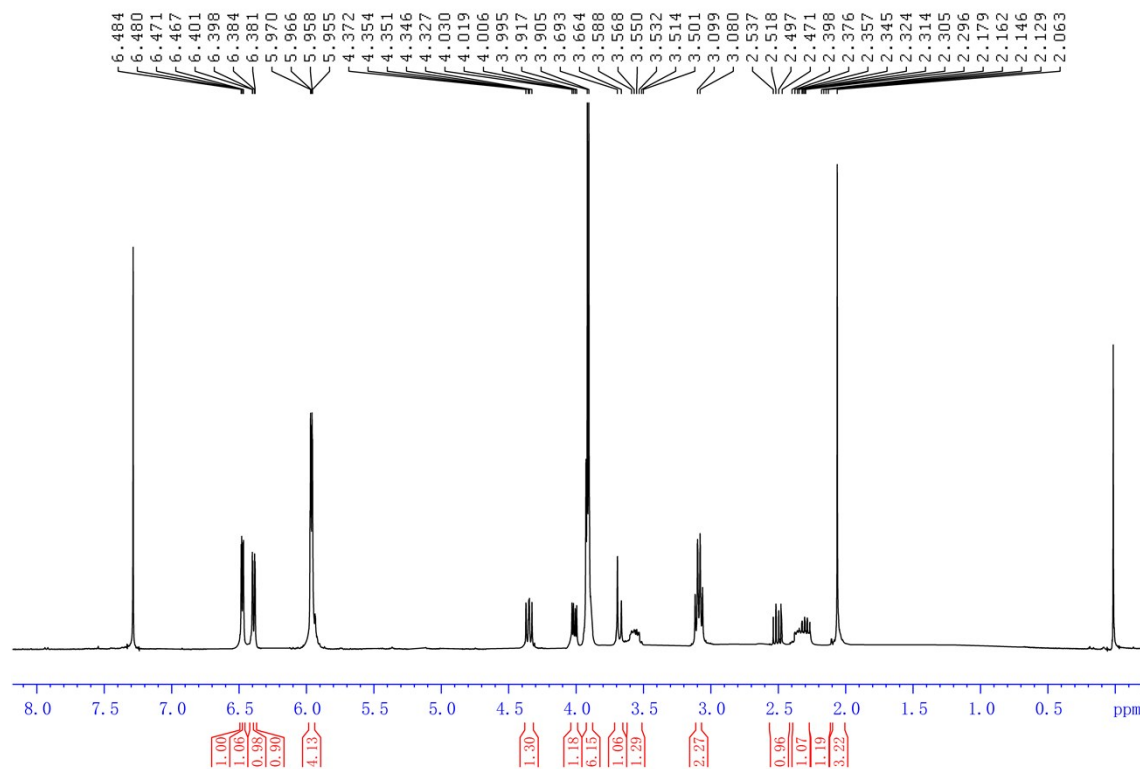

6-b

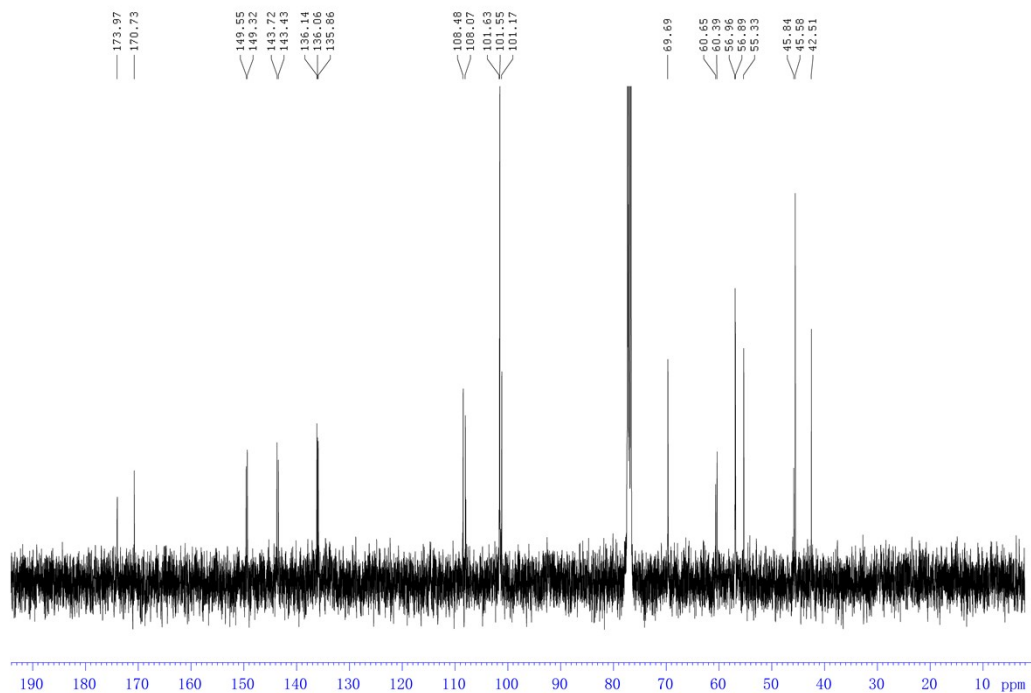

6-c

Spectrum from DataSET120.wiff (sample 6) - Sample006, Experiment 1, +TOF MS (50 - 1500)

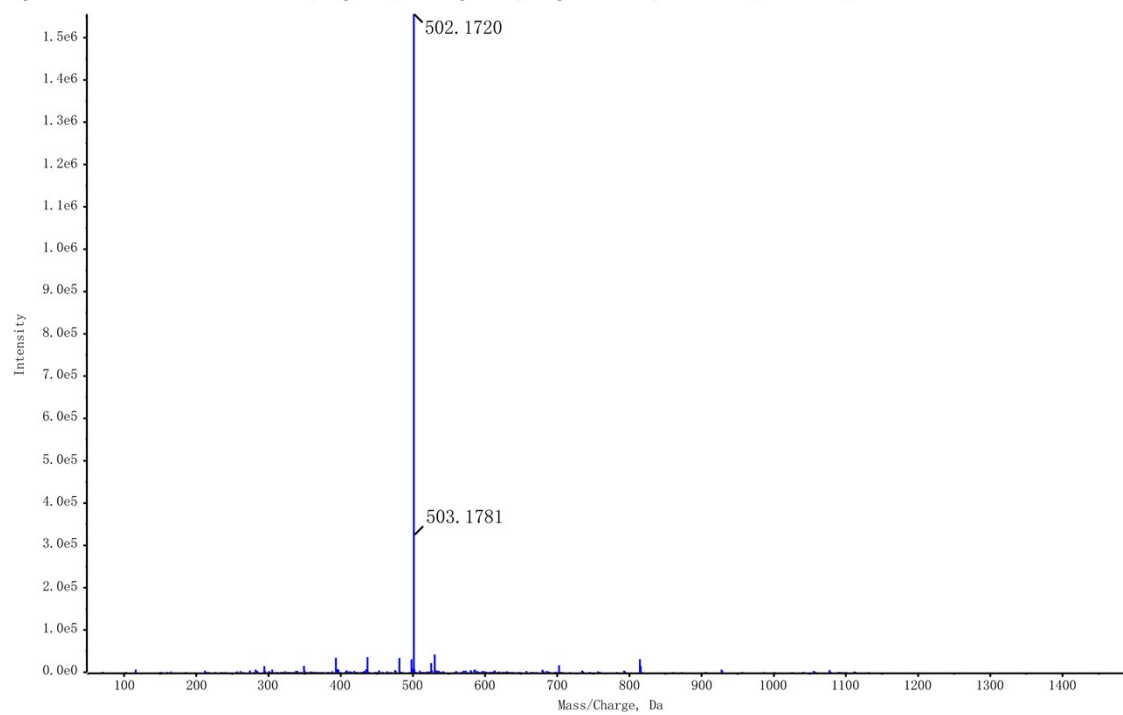

**Figure S6.** <sup>1</sup>H-NMR (6-a), <sup>13</sup>C-NMR (6-b) and HR-ESI-MS (6-c) spectra of compound 7

7-a

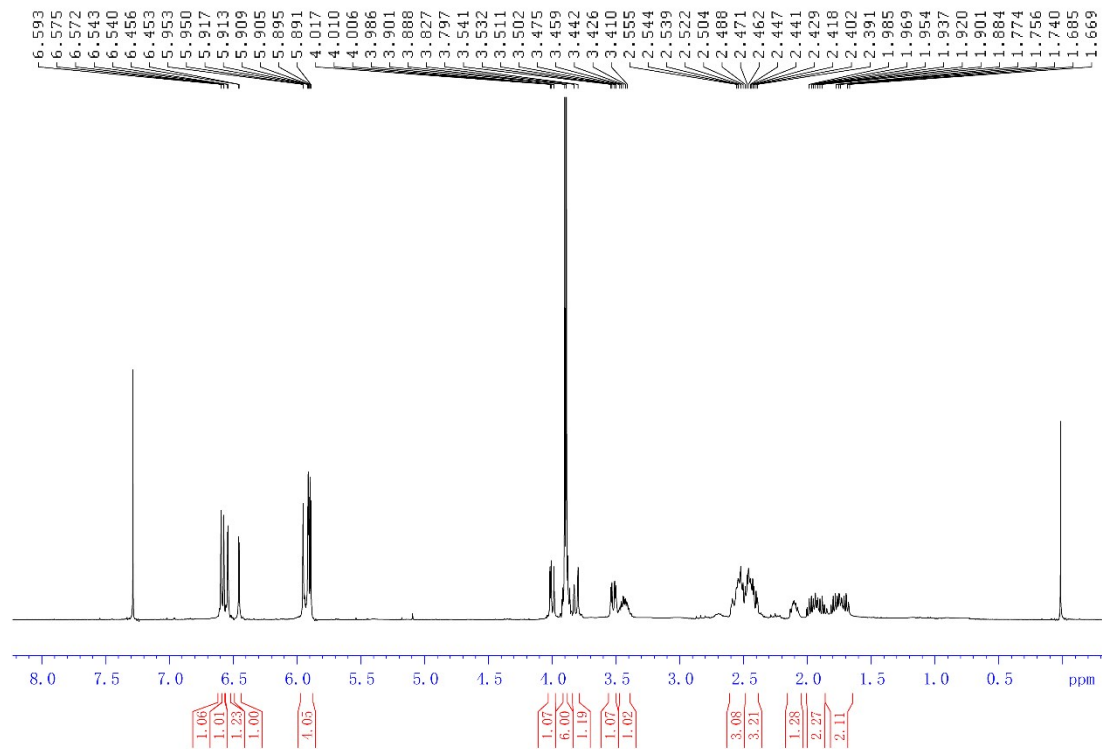

7-b

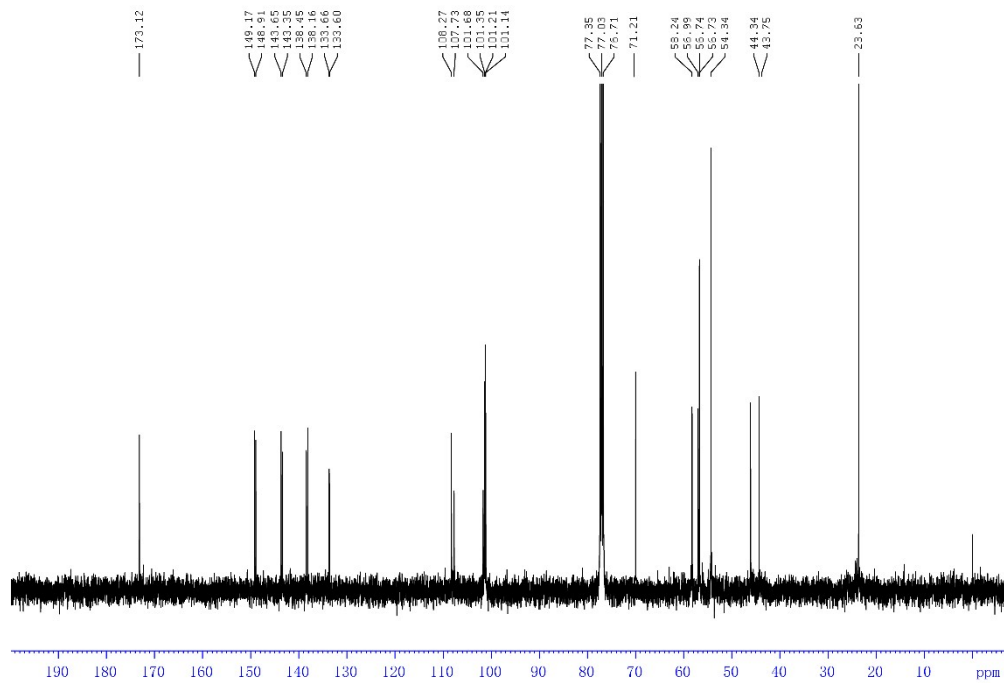

7-c

Spectrum from DataSET11.wiff (sample 7) - pepAME-7, Experiment1, +TOF MS (100 - 1000)

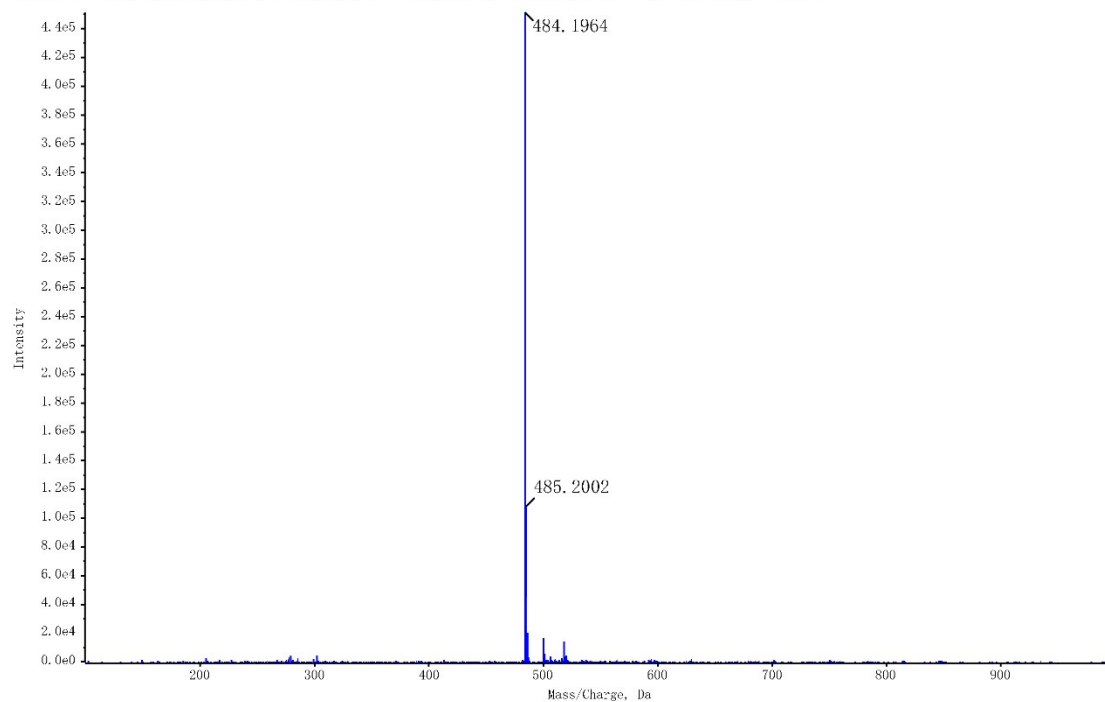

**Figure S7.**  $^1\text{H-NMR}$  (7-a),  $^{13}\text{C-NMR}$  (7-b) and HR-ESI-MS (7-c) spectra of compound 8

8-a

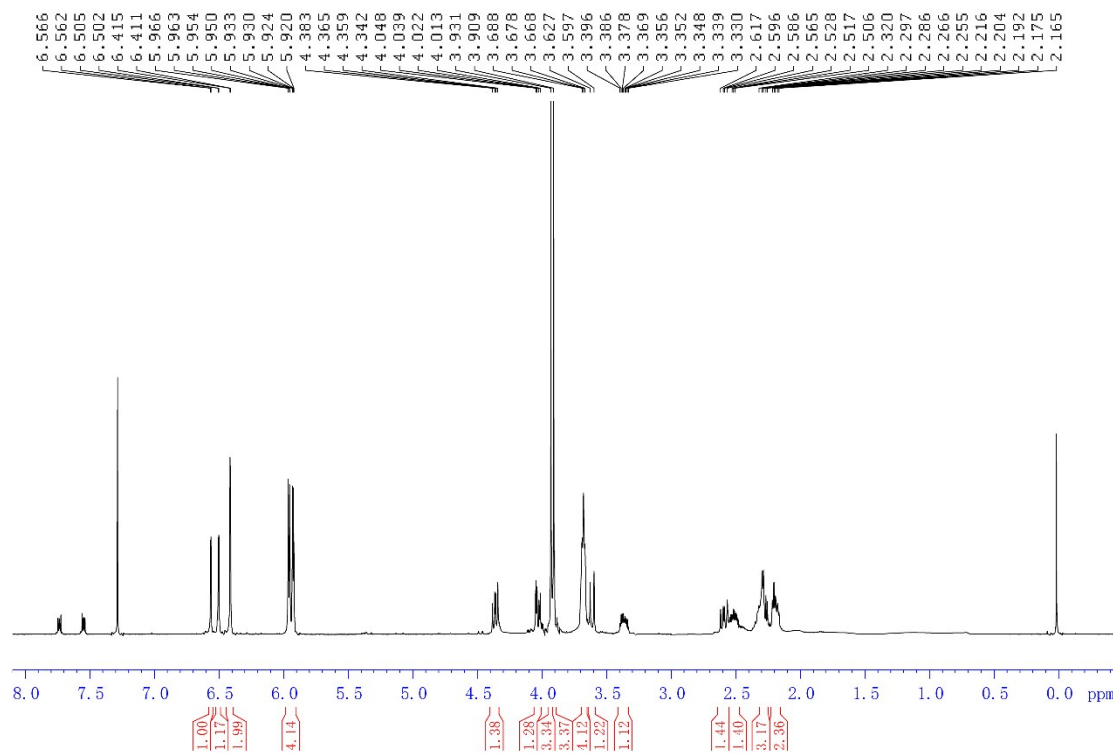

8-b

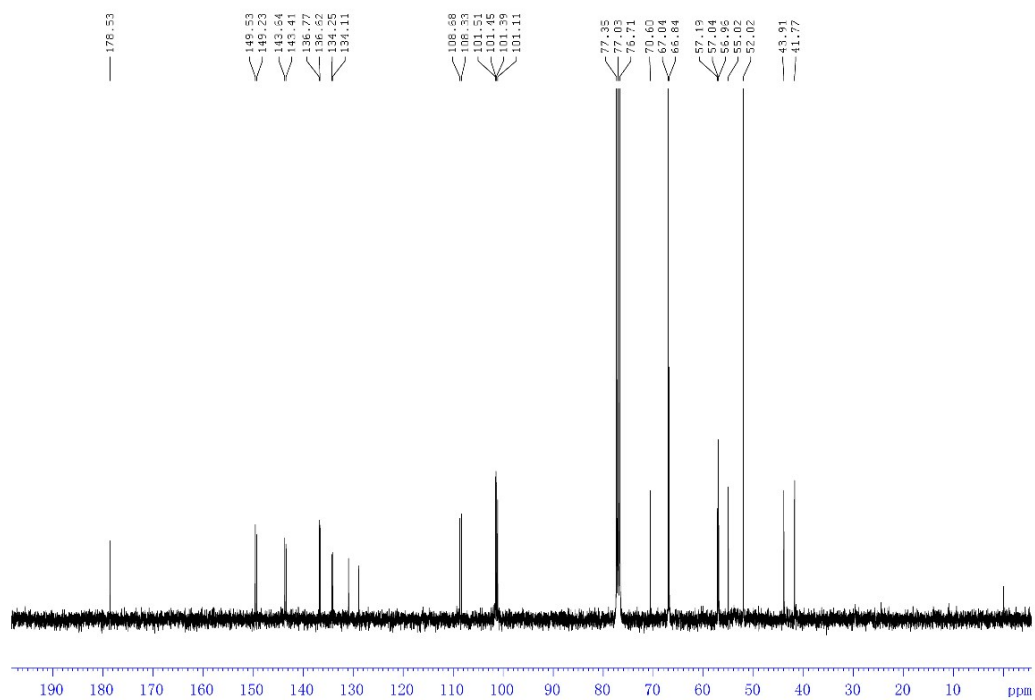

### 8-c

Spectrum from DataSET13.wiff (sample 8) - pepAME-8, Experiment1, +TOF MS (100 - 1000)

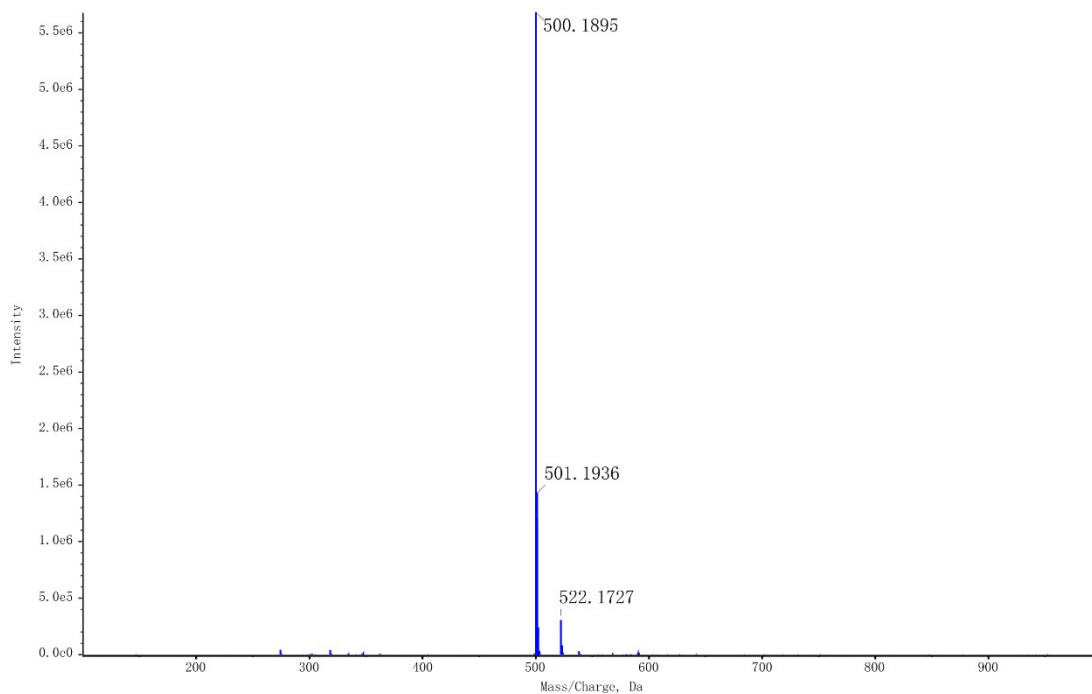

**Figure S8.** <sup>1</sup>H-NMR (8-a), <sup>13</sup>C-NMR (8-b) and HR-ESI-MS (8-c) spectra of compound 9

### 9-a

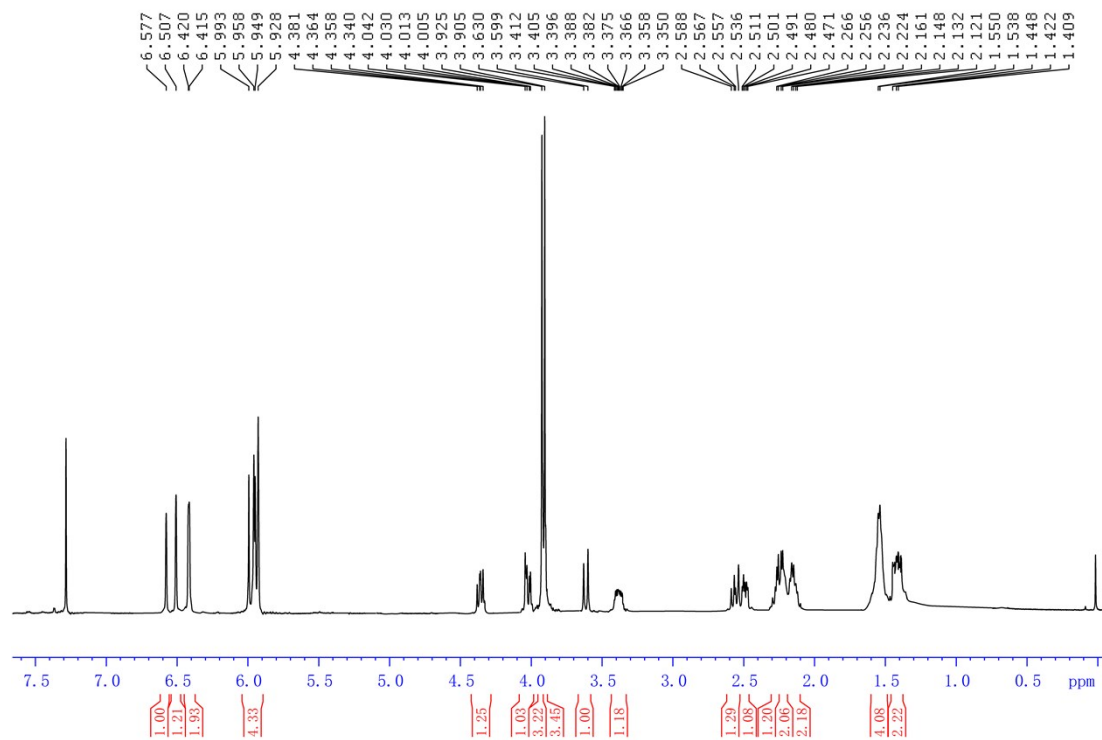

9-b

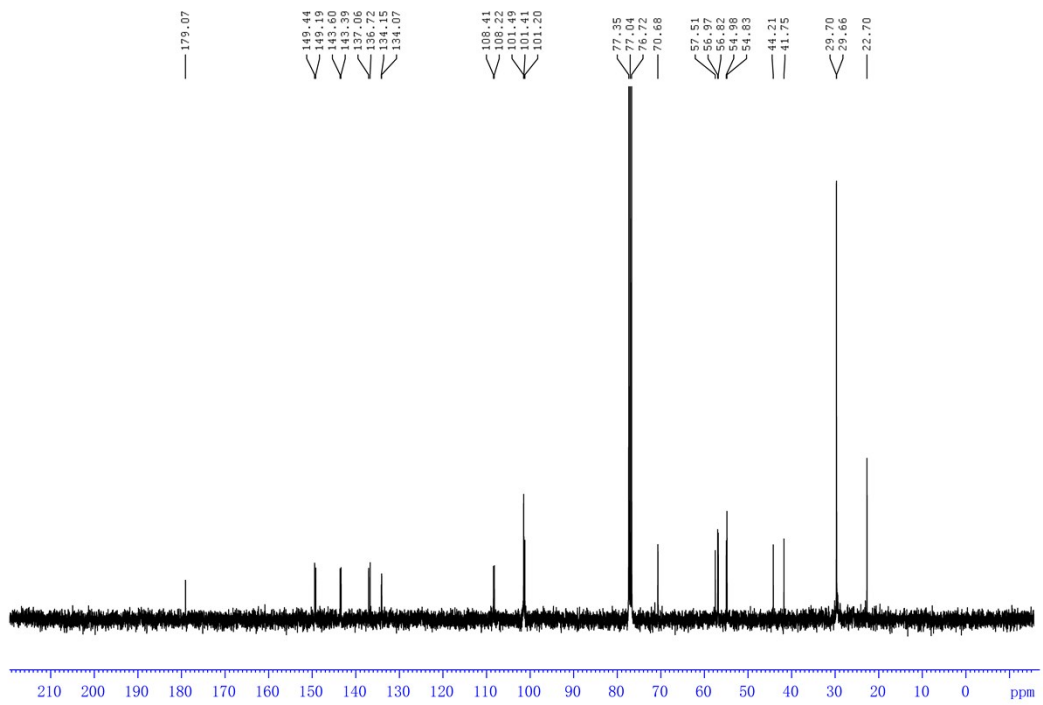

9-c

Spectrum from DataSET119.wiff (sample 9) - Sample009, Experiment 1, +TOF MS (50 - 1500)

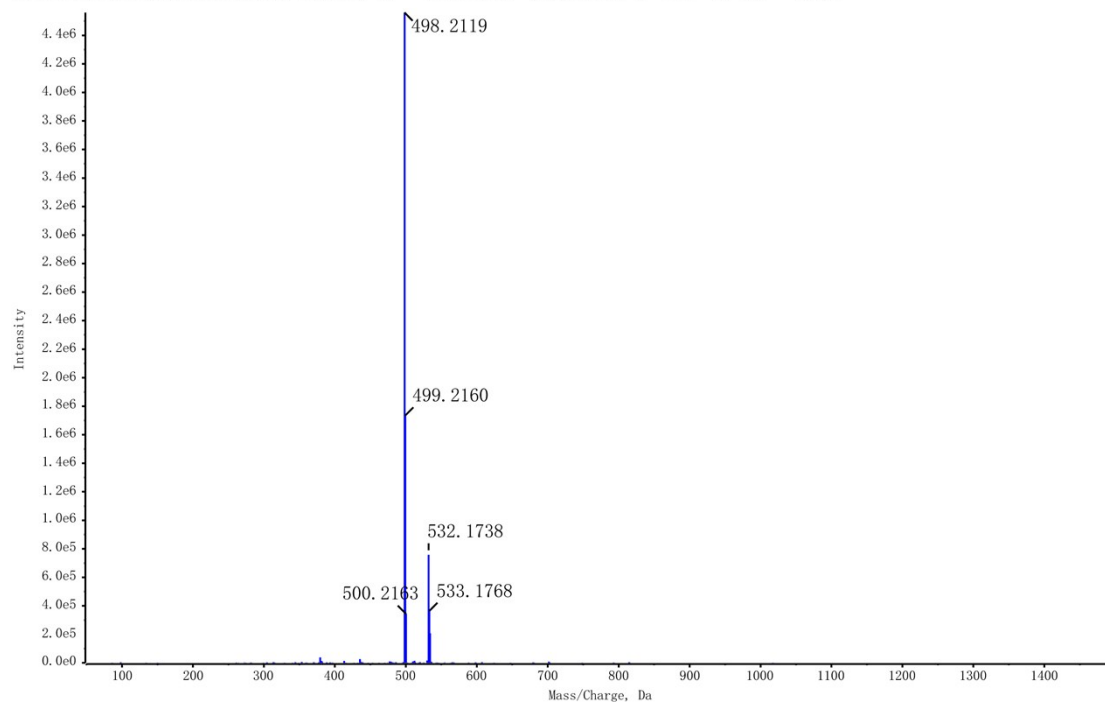

Figure S9.  $^1\text{H-NMR}$  (9-a),  $^{13}\text{C-NMR}$  (9-b) and HR-ESI-MS (9-c) spectra of compound 10

10-a

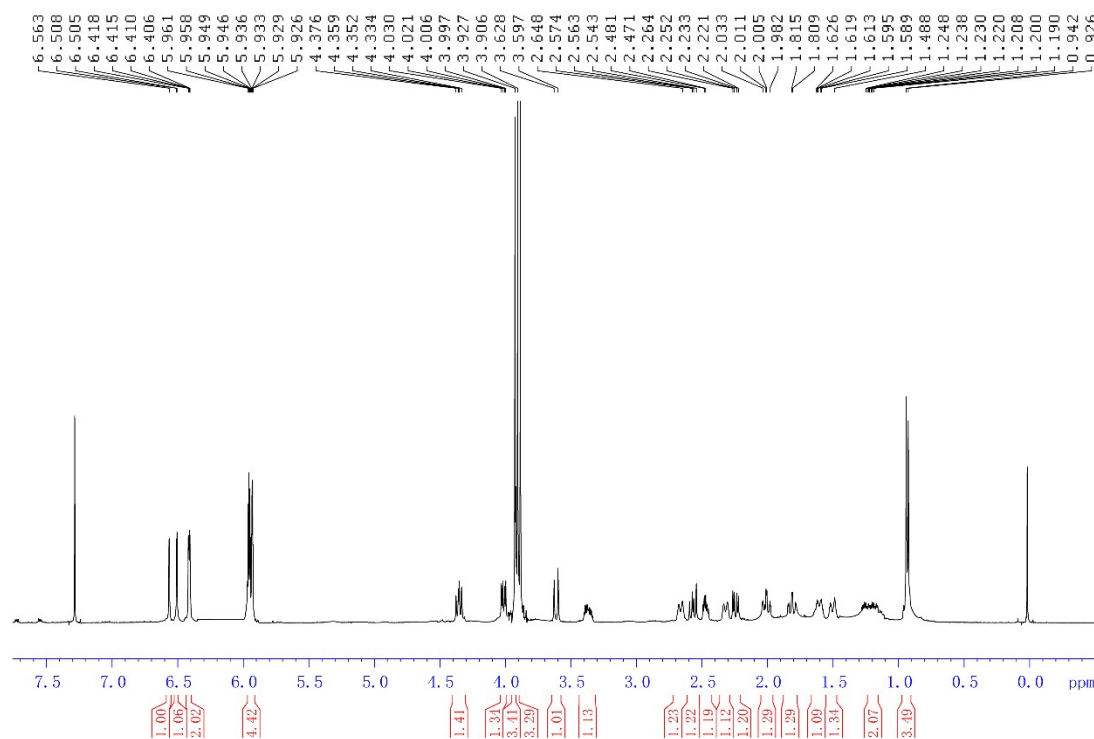

10-b

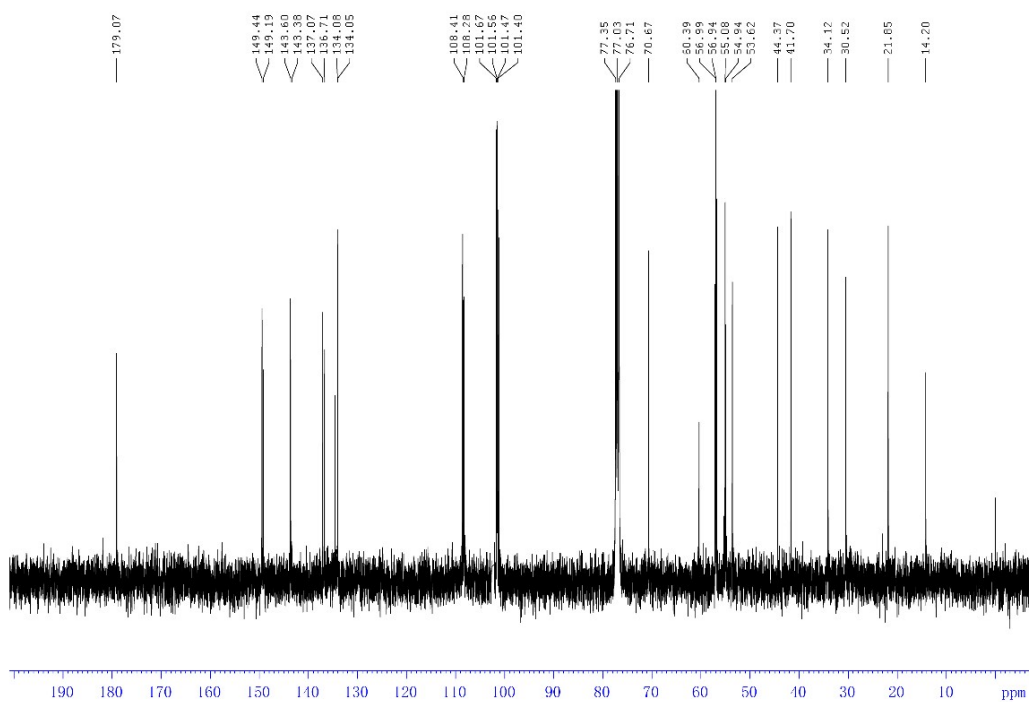

### 10-c

Spectrum from DataSET14.wiff (sample 10) - pepAME-10, Experiment 1, +TOF MS (100 - 1000)

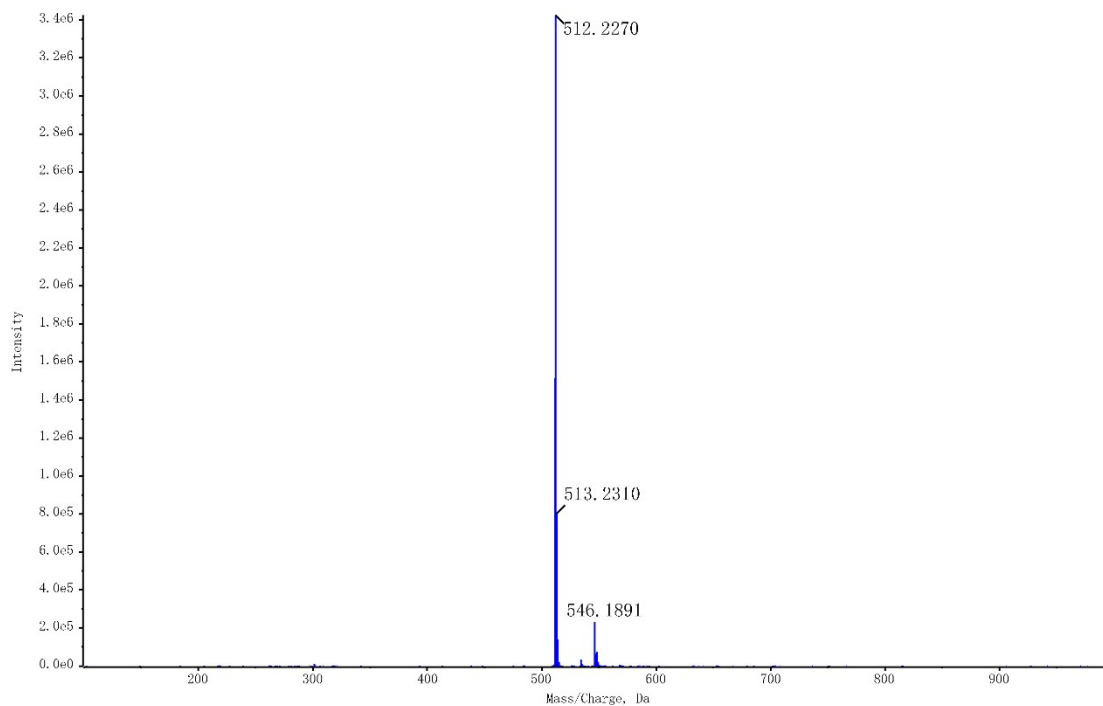

**Figure S10.**  $^1\text{H-NMR}$  (10-a),  $^{13}\text{C-NMR}$  (10-b) and HR-ESI-MS (10-c) spectra of compound 11



11-a

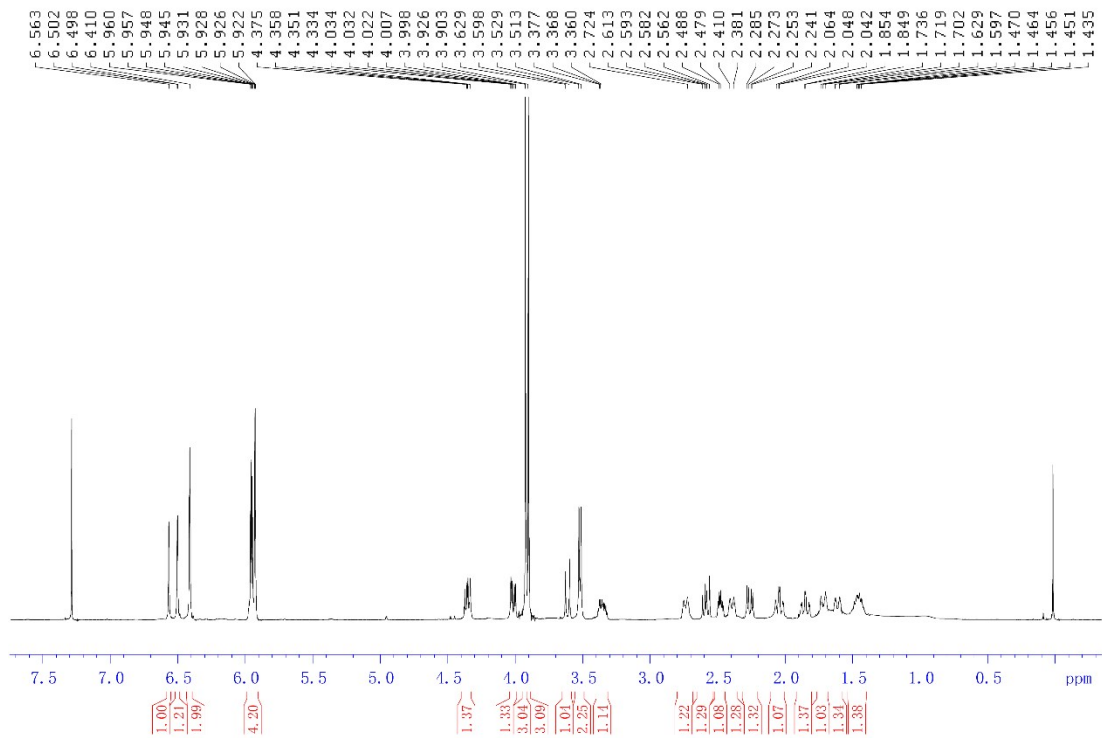

11-b

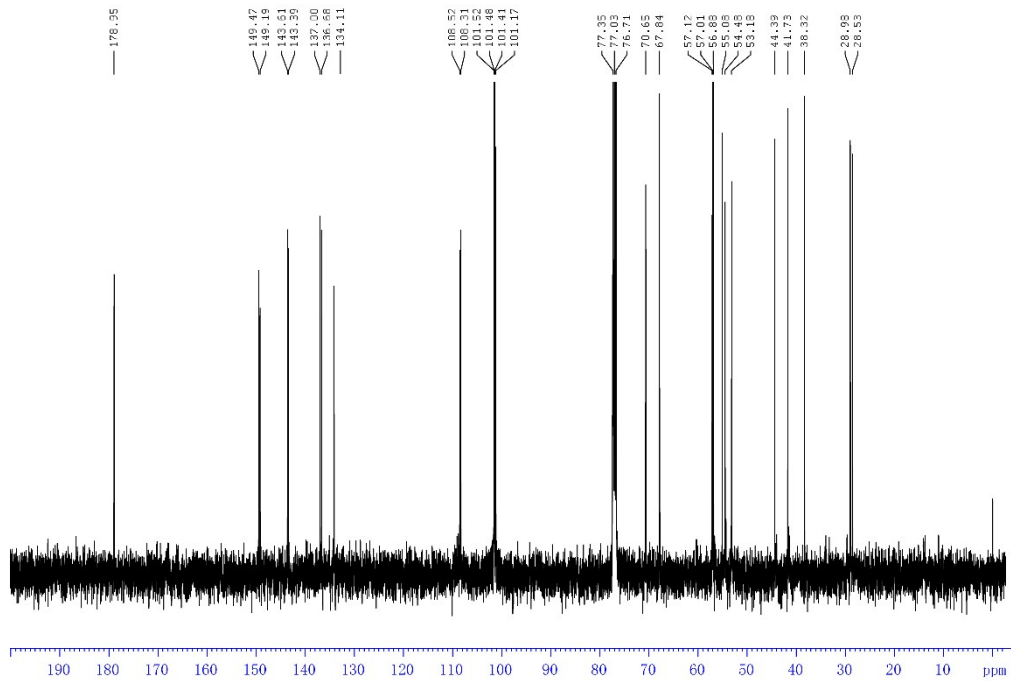

11-c

Spectrum from DataSET15.wiff (sample 11) - pepAME-11, Experiment1, +TOF MS (100 - 1000)

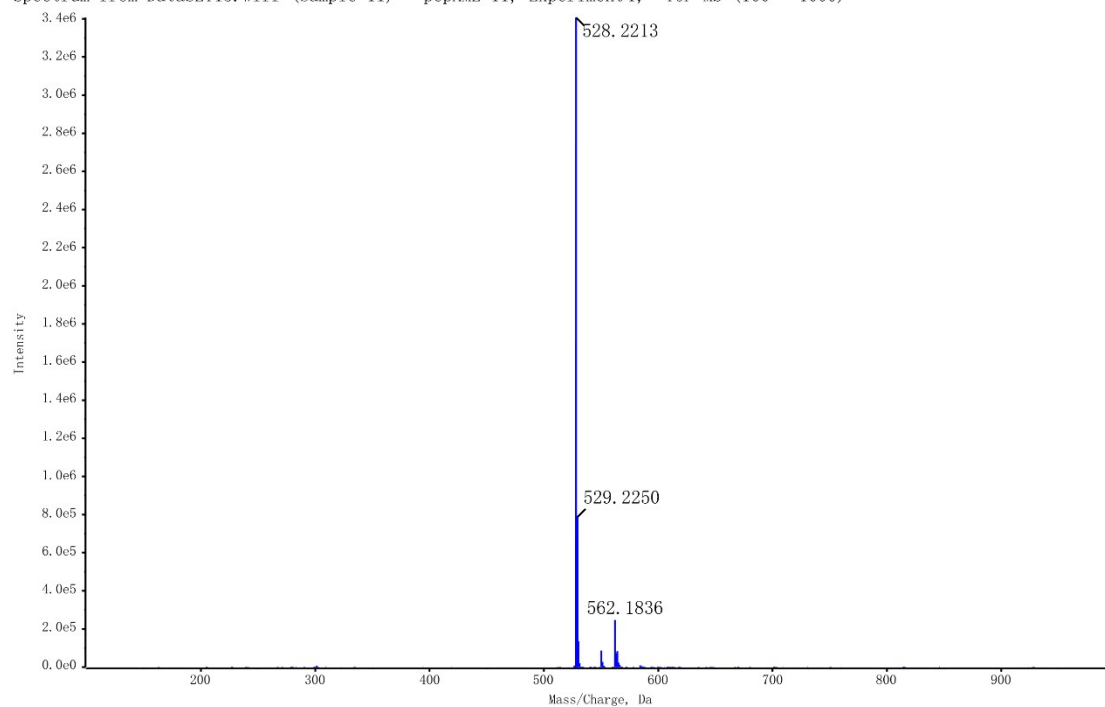

**Figure S11.**  $^1\text{H-NMR}$  (11-a),  $^{13}\text{C-NMR}$  (11-b) and HR-ESI-MS (11-c) spectra of compound 12

12-a

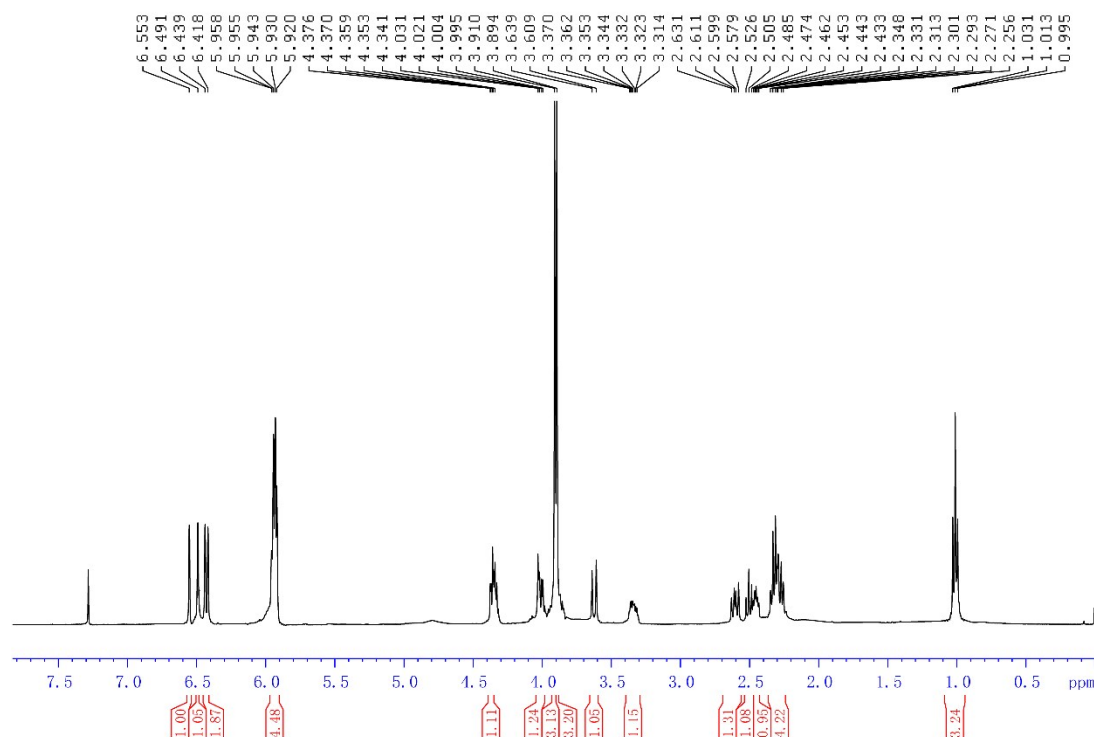

12-b

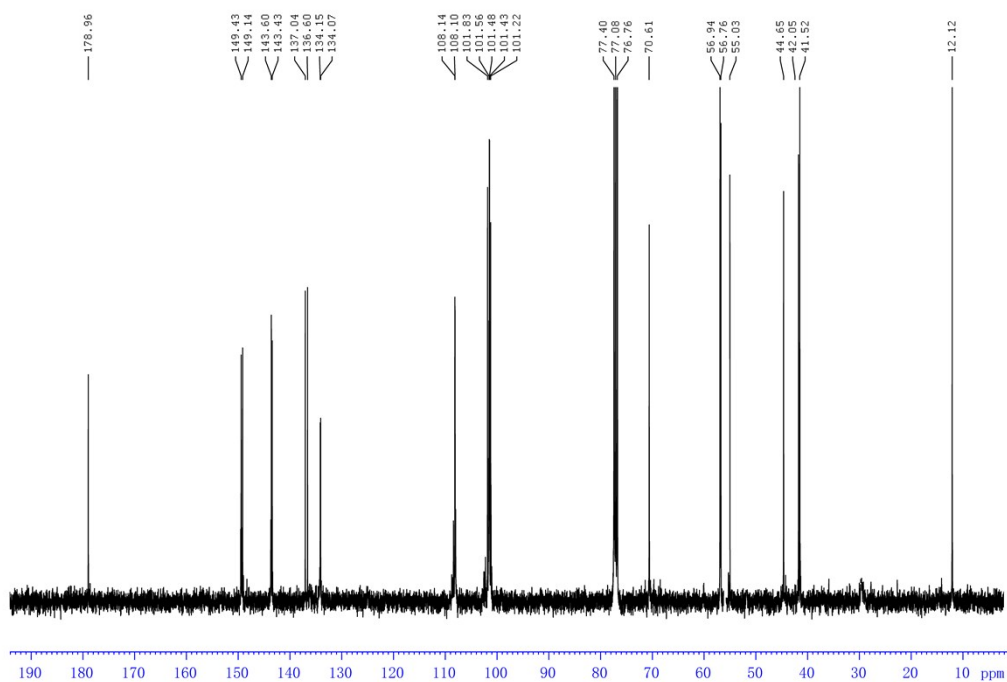

### 12-c

Spectrum from DataSET110.wiff (sample 12) - pepAME-12, Experiment 1, +TOF MS (100 - 1000)

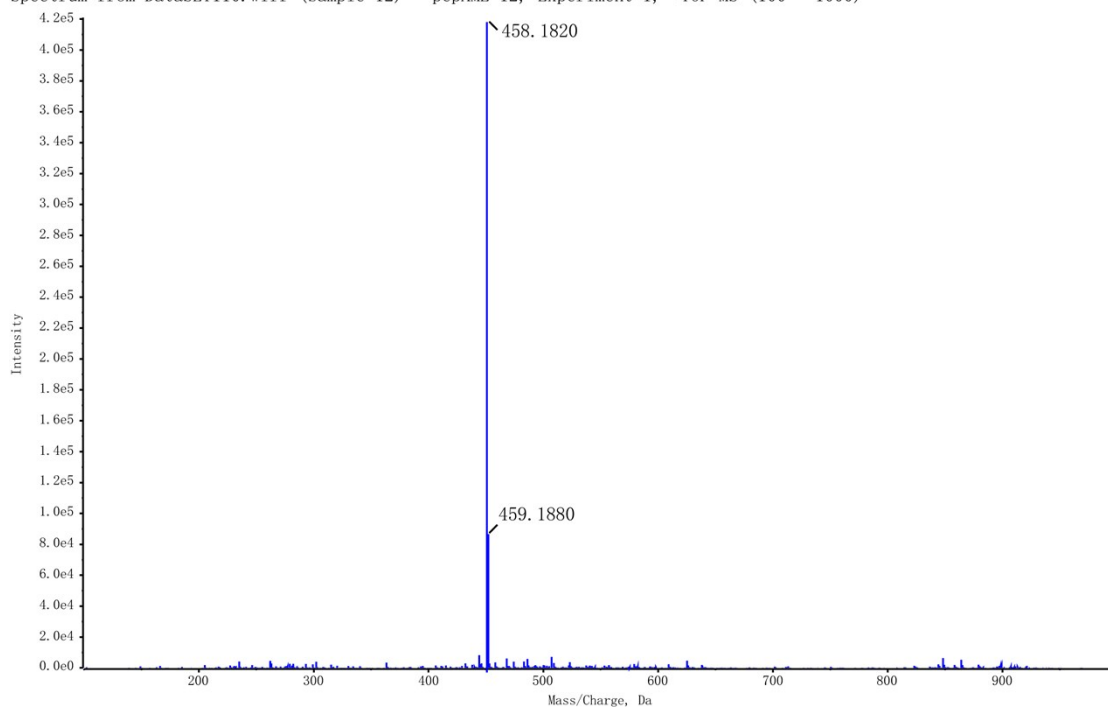

**Figure S12.**  $^1\text{H-NMR}$  (12-a),  $^{13}\text{C-NMR}$  (12-b) and HR-ESI-MS (12-c) spectra of compound 13

### 13-a

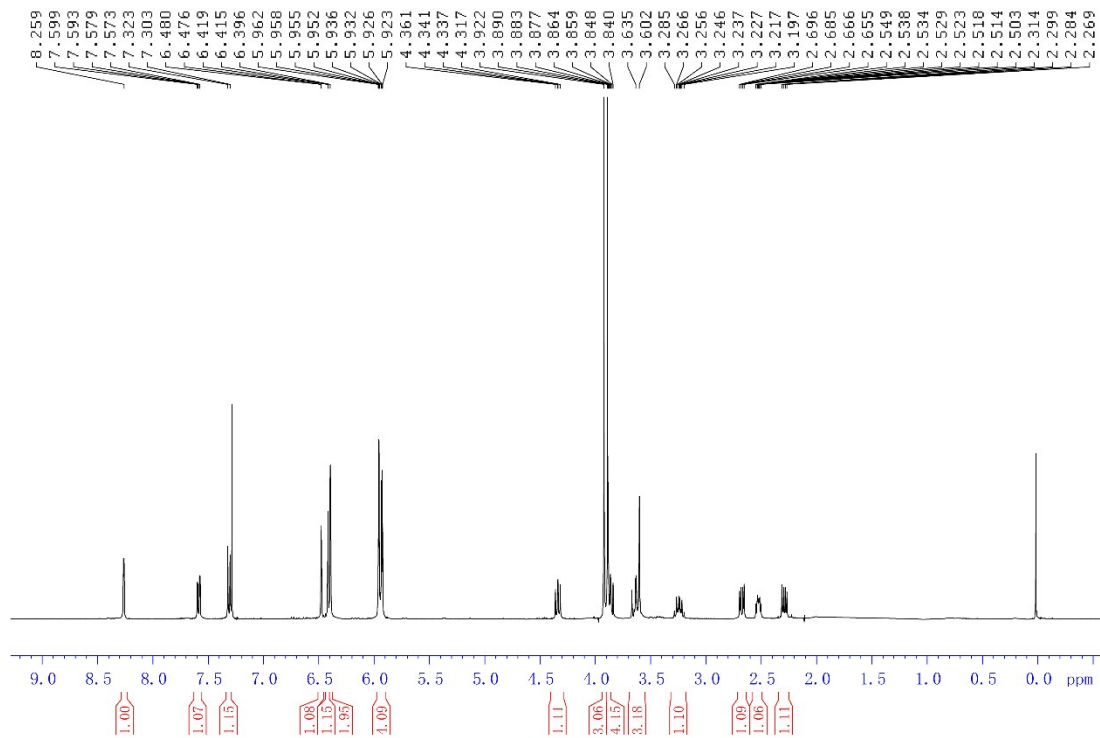

13-b

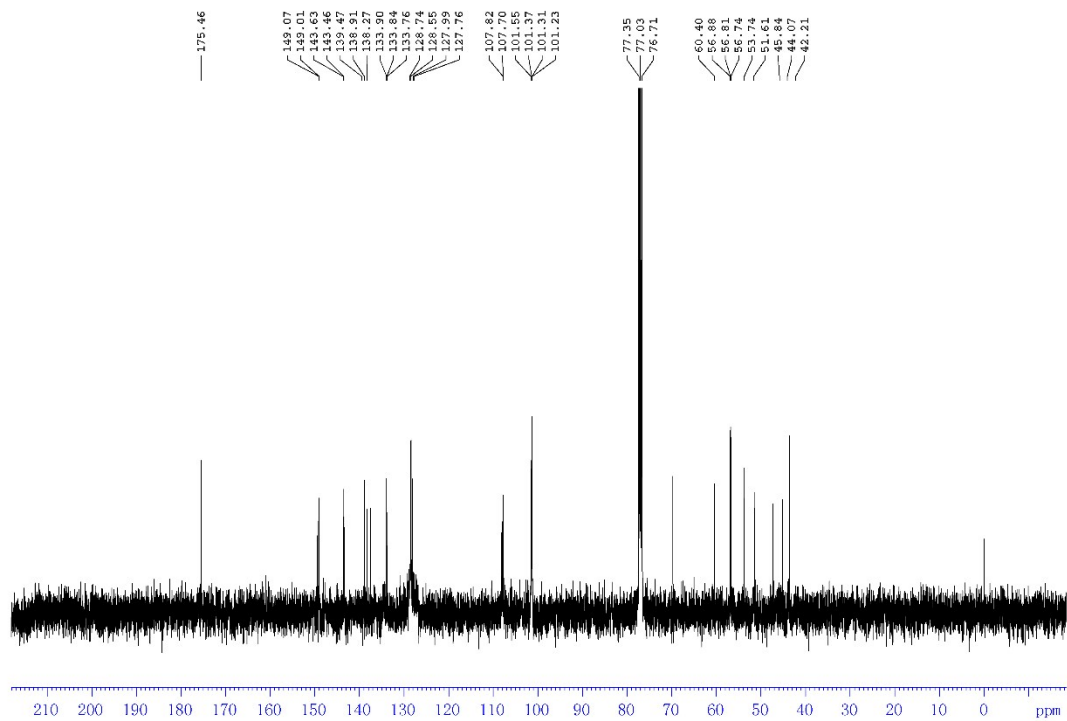

13-c

Spectrum from DataSET111.wiff (sample 13) - pepAME-13, Experiment 1, +TOF MS (100 - 1000)

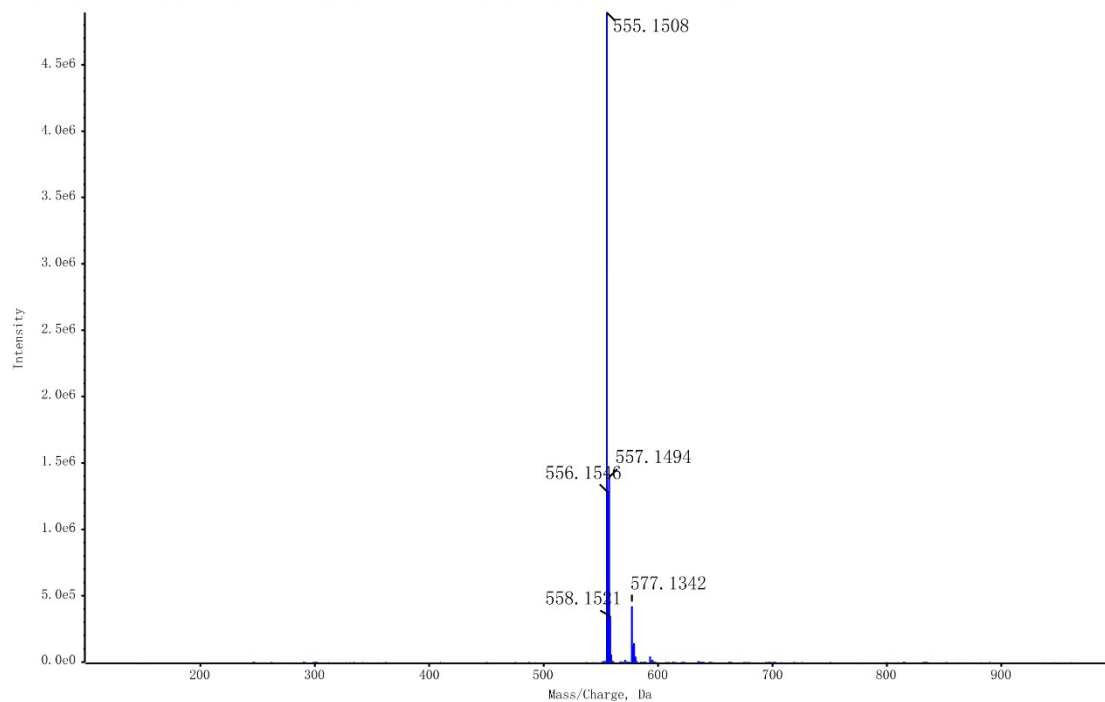

**Figure S13.**  $^1\text{H-NMR}$  (13-a),  $^{13}\text{C-NMR}$  (13-b) and HR-ESI-MS (13-c) spectra of compound 14

14-a

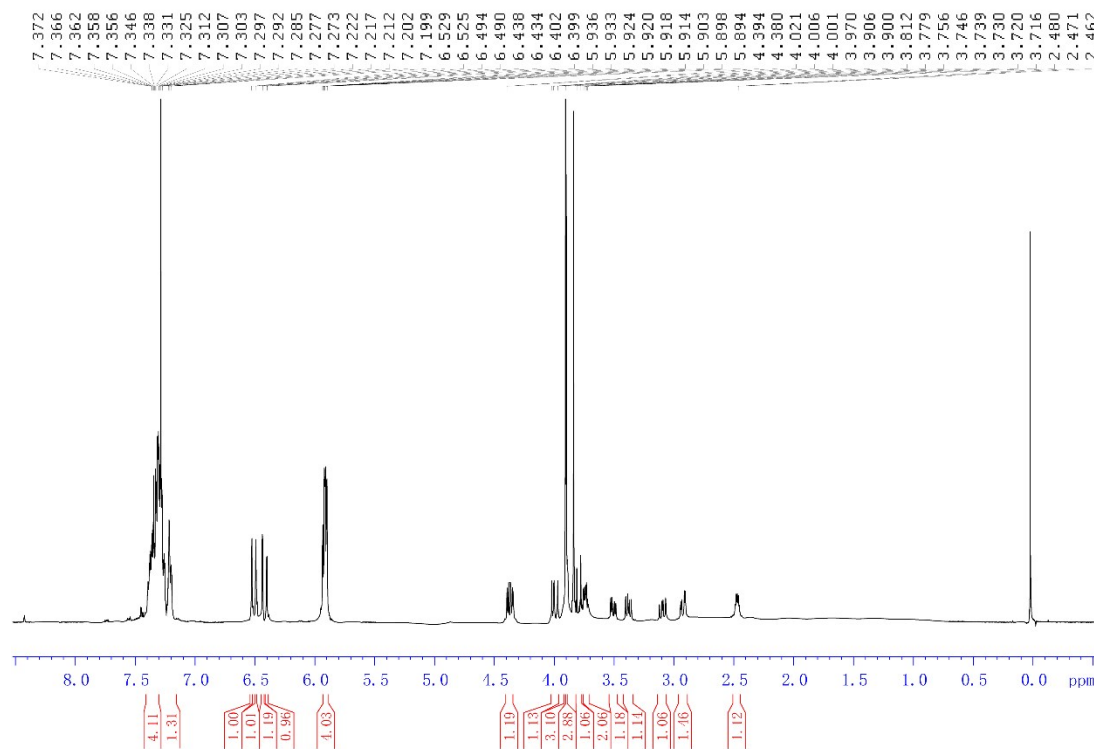

14-b

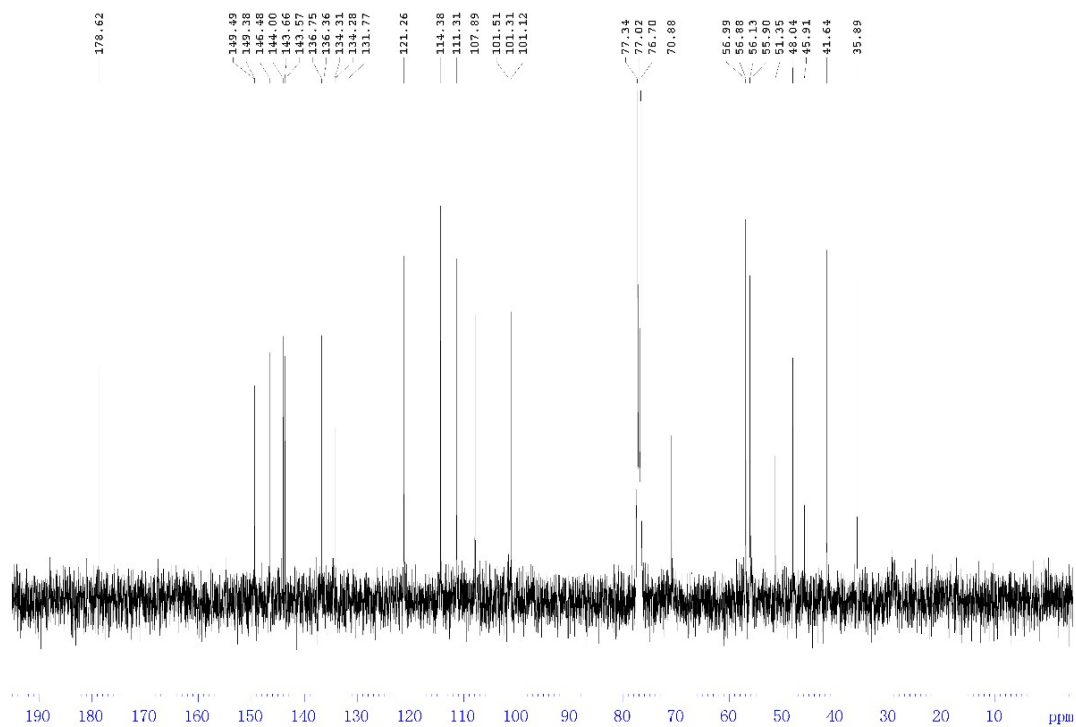

### 14-c

Spectrum from DataSET16.wiff (sample 14) - pepAME-14, Experiment 1, +TOF MS (100 - 1000)

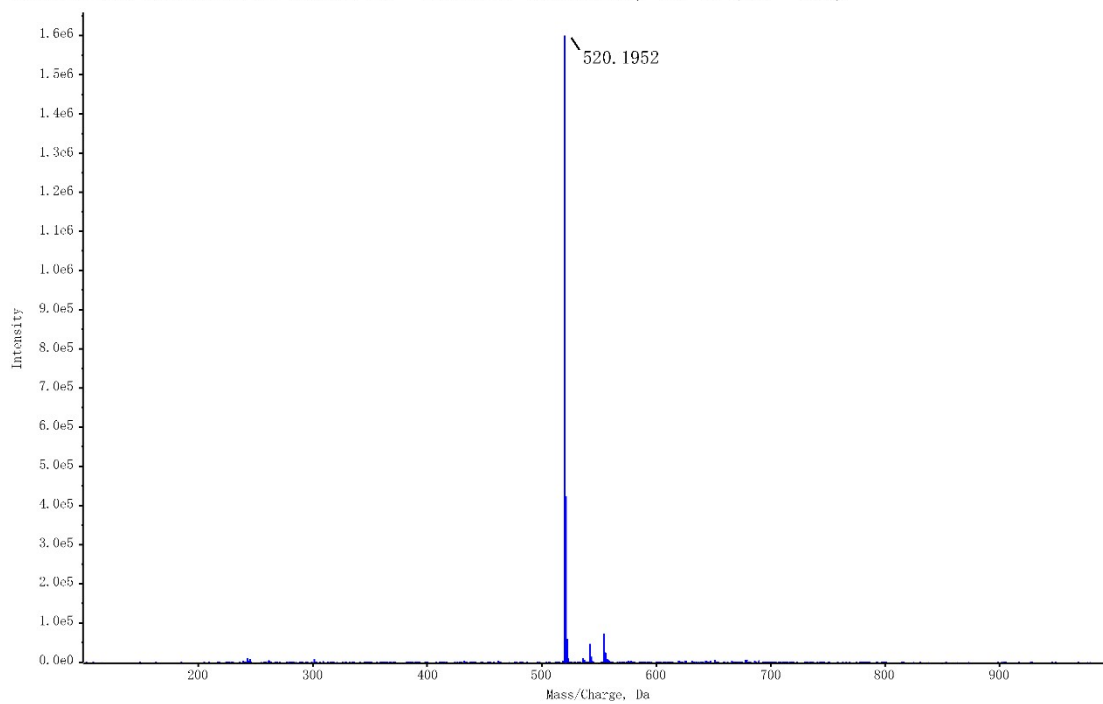

**Figure S14.**  $^1\text{H}$ -NMR (14-a),  $^{13}\text{C}$ -NMR (14-b) and HR-ESI-MS (14-c) spectra of compound 15

15-a

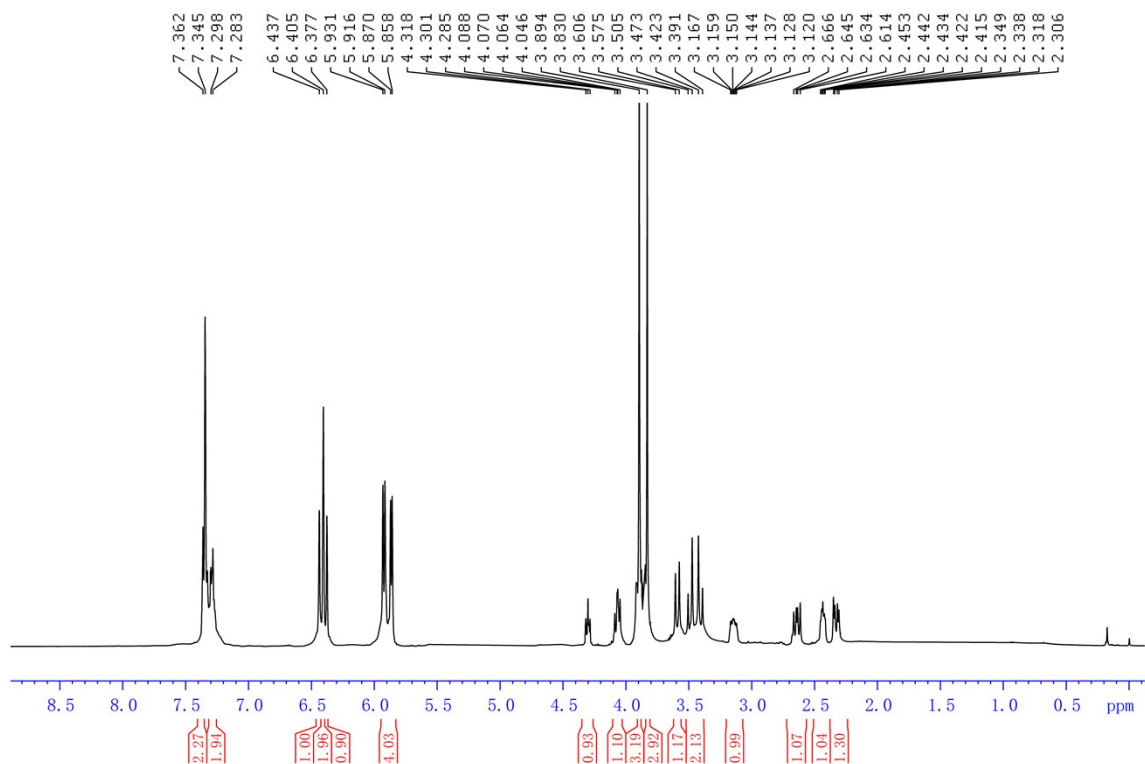

15-b

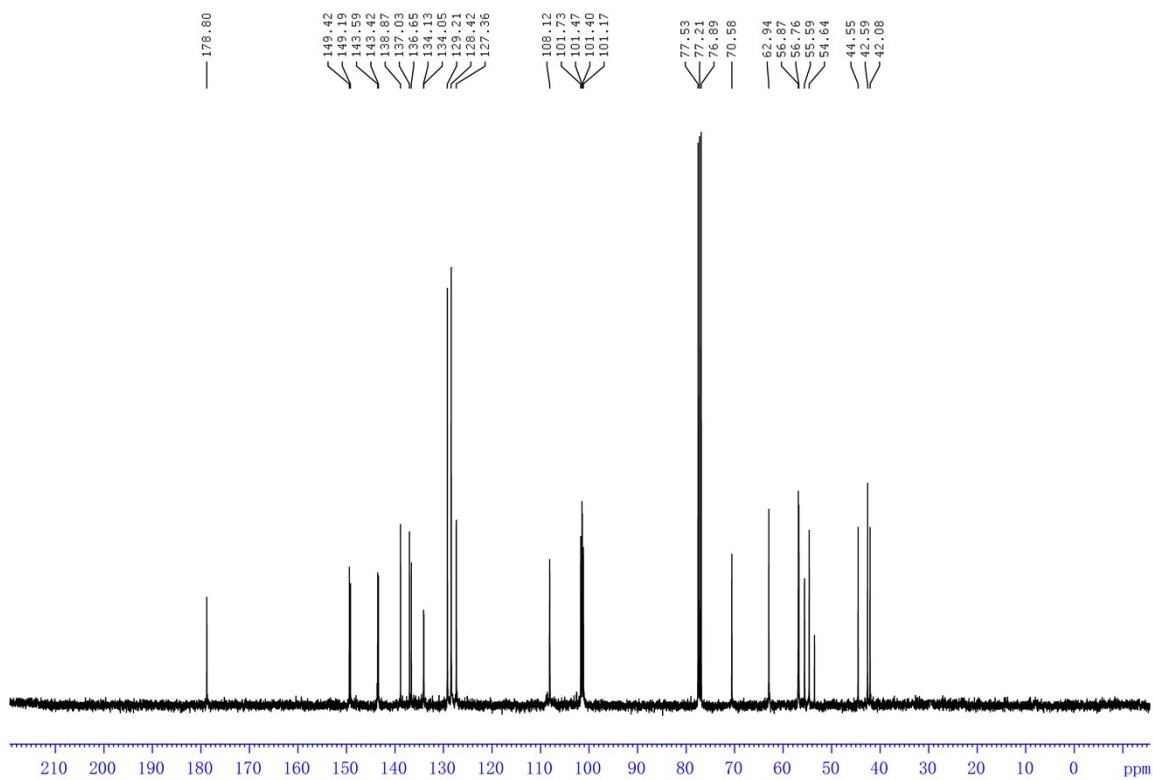

### 15-c

Spectrum from DataSET121.wiff (sample 1) - Sample003, Experiment 1, +TOF MS (50 - 1500)

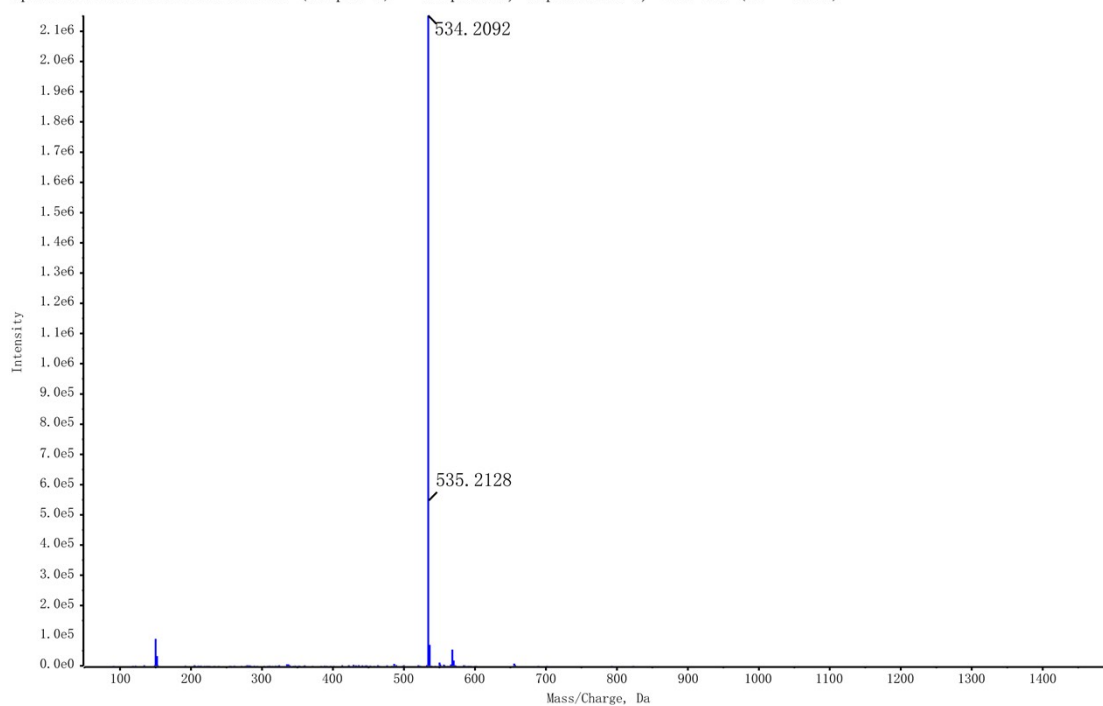

**Figure S15.**  $^1\text{H-NMR}$  (15-a),  $^{13}\text{C-NMR}$  (15-b) and HR-ESI-MS (15-c) spectra of compound 16

### 16-a

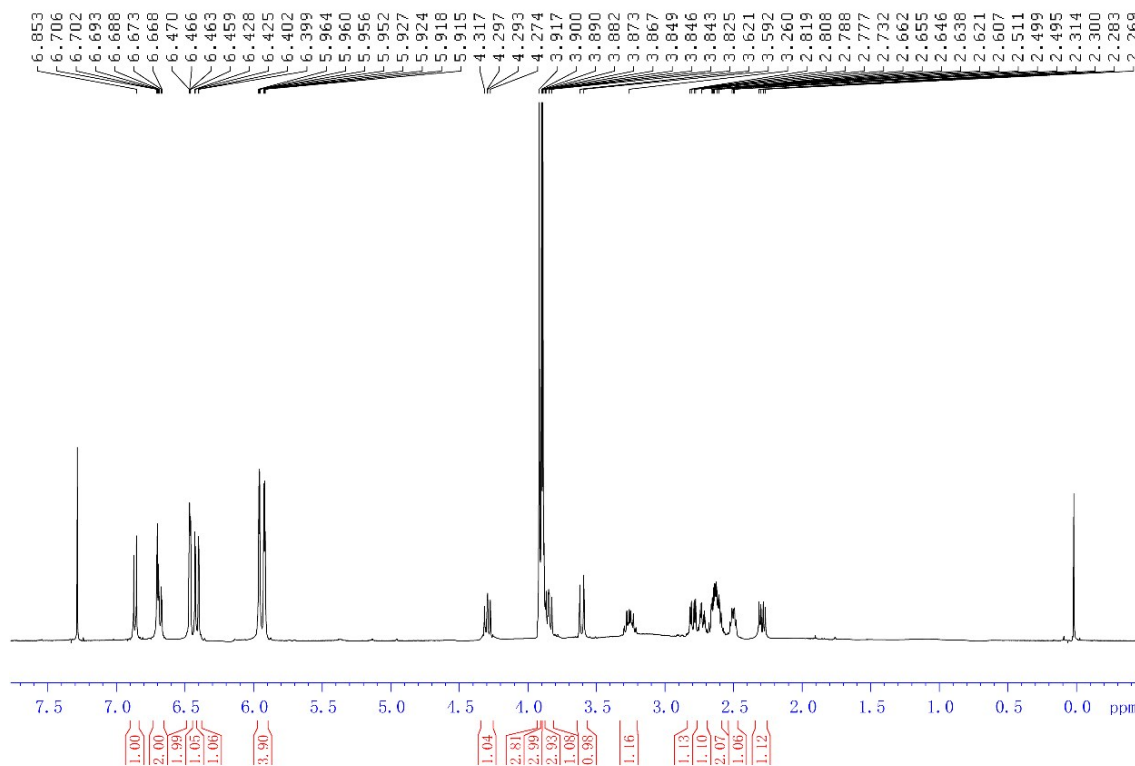



16-b

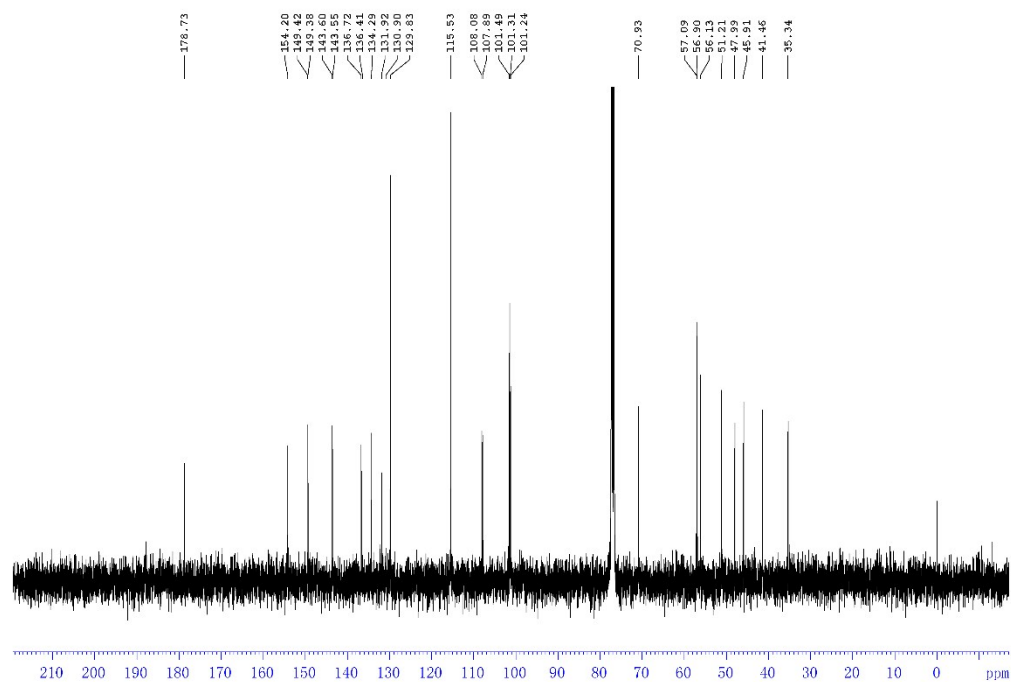

16-c

Spectrum from DataSET19.wiff (sample 16) - pepAME-16, Experiment 1, +TOF MS (100 - 1000)

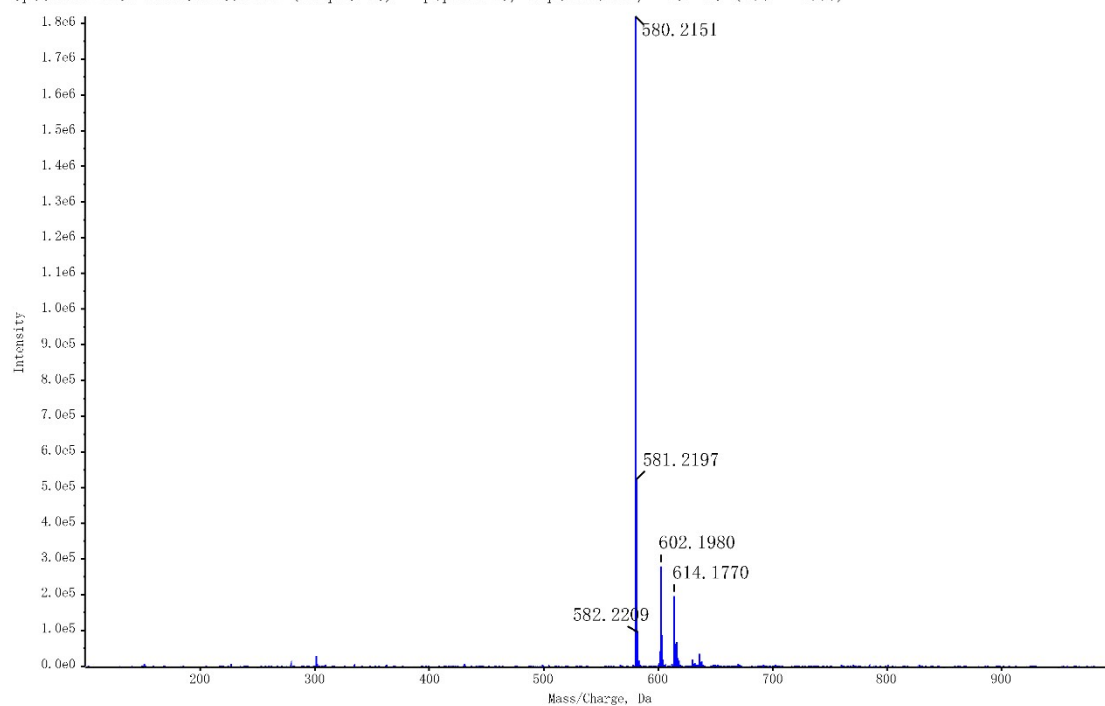

**Figure S16.** <sup>1</sup>H-NMR (16-a), <sup>13</sup>C-NMR (16-b) and HR-ESI-MS (16-c) spectra of compound 17

17-a

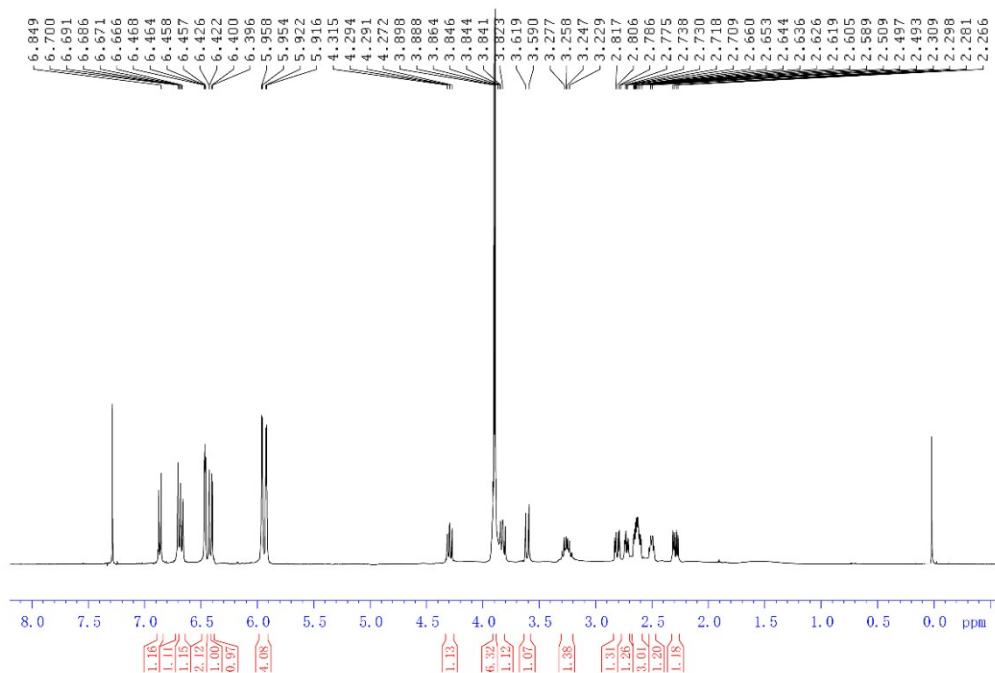

17-b

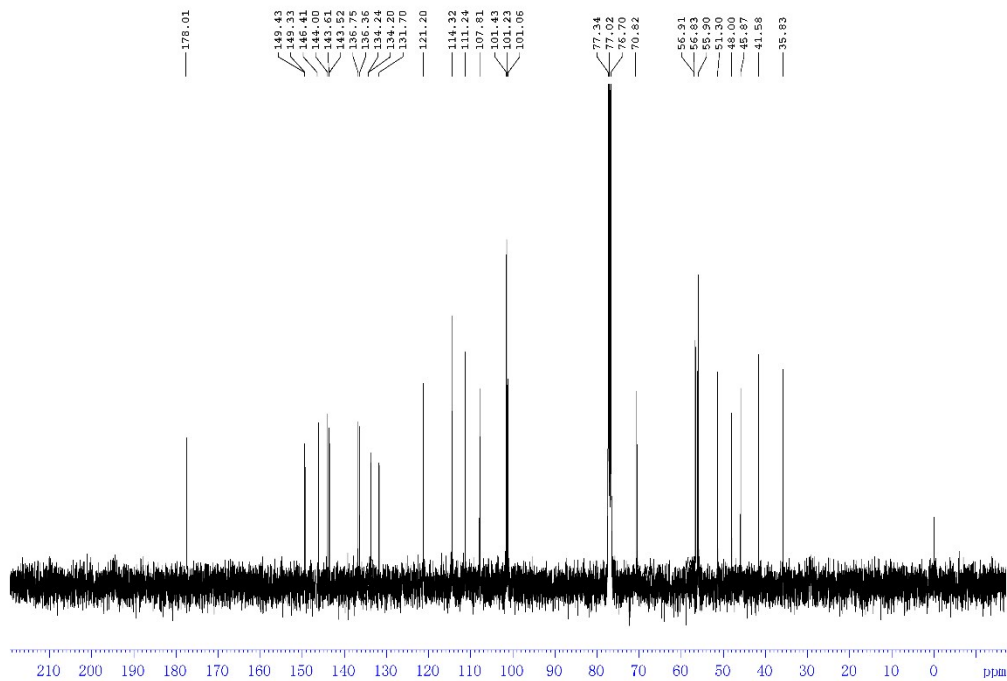

### 17-c

Spectrum from DataSET114.wiff (sample 17) - pepAME-17, Experiment 1, +TOF MS (100 - 1000)

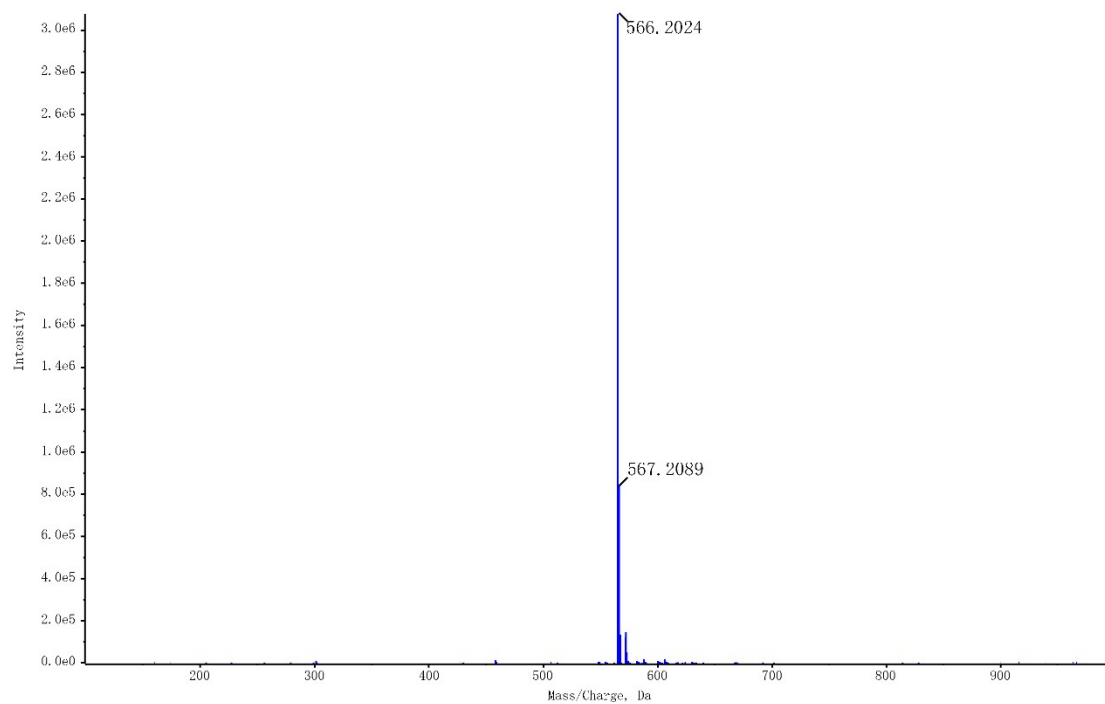

**Figure S17.**  $^1\text{H-NMR}$  (17-a),  $^{13}\text{C-NMR}$  (17-b) and HR-ESI-MS (17-c) spectra of compound 18

### 18-a

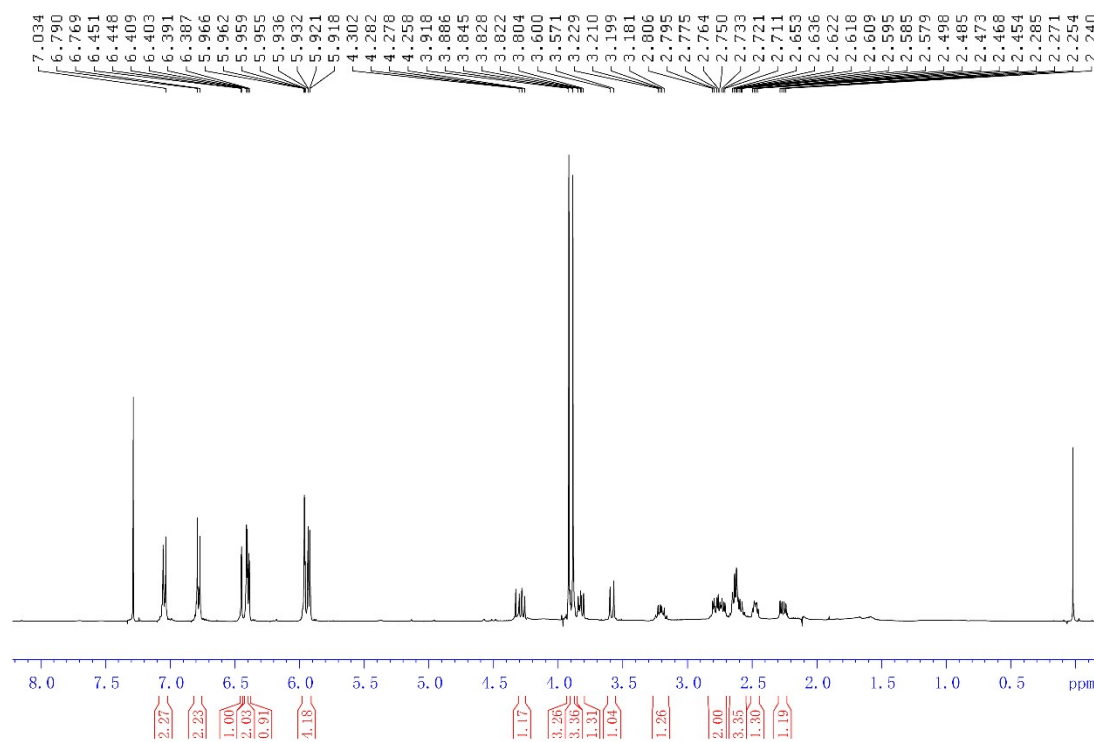

18-b

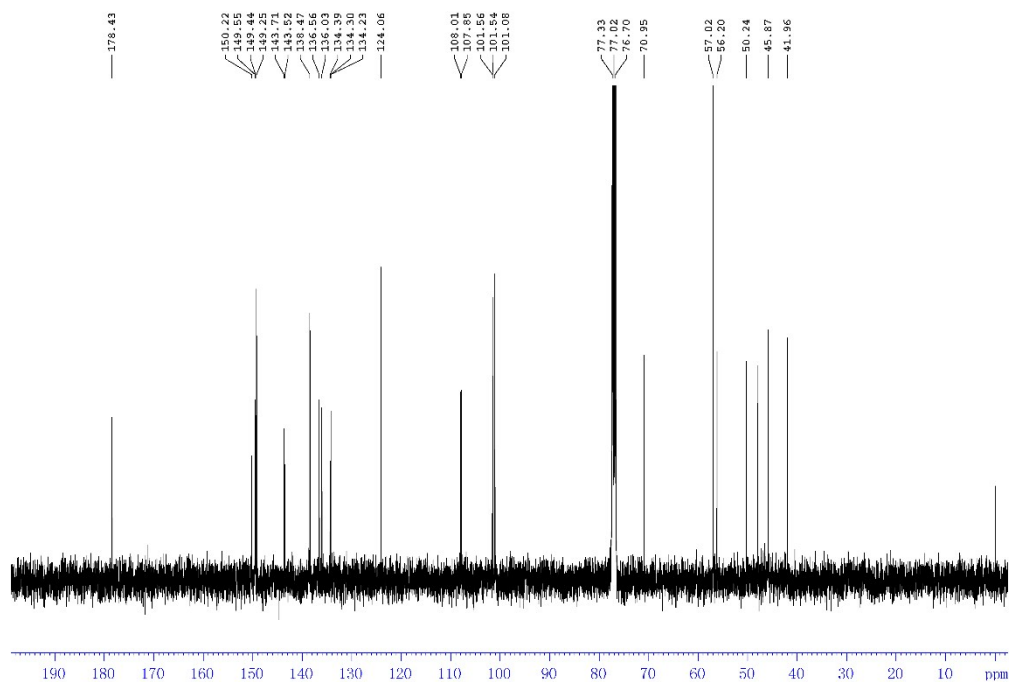

18-c

Spectrum from DataSET114.wiff (sample 18) - pepAME-18, Experiment 1, +TOF MS (100 - 1000)

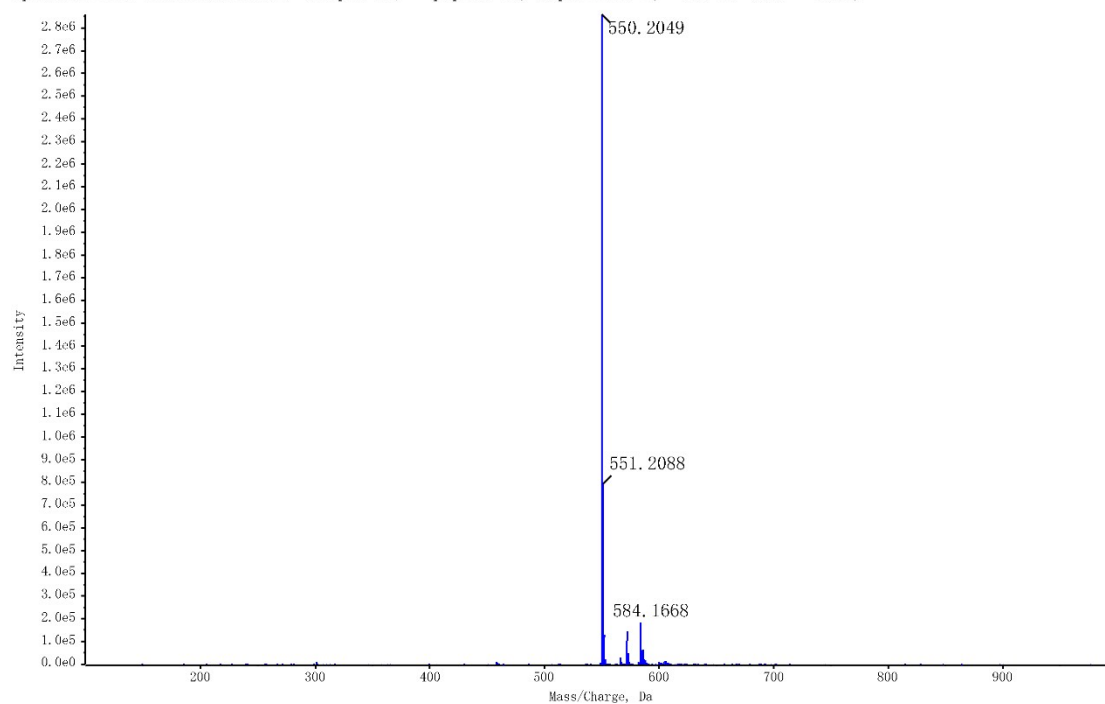

**Figure S18.**  $^1\text{H}$ -NMR (18-a),  $^{13}\text{C}$ -NMR (18-b) and HR-ESI-MS (18-c) spectra of compound 19

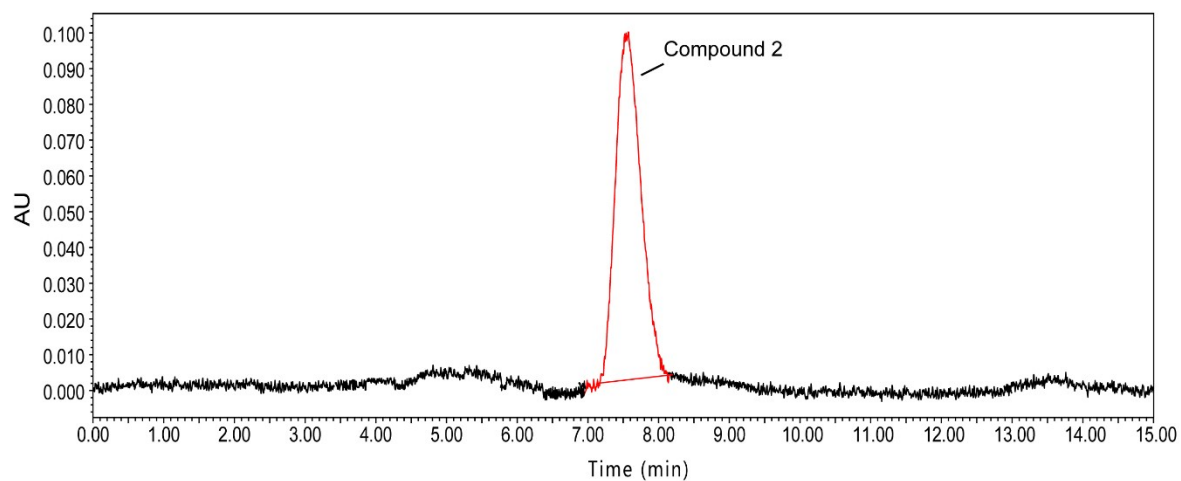

**Figure S19.** Purity test of compound 2 by HPLC ( $\lambda=210$  nm)

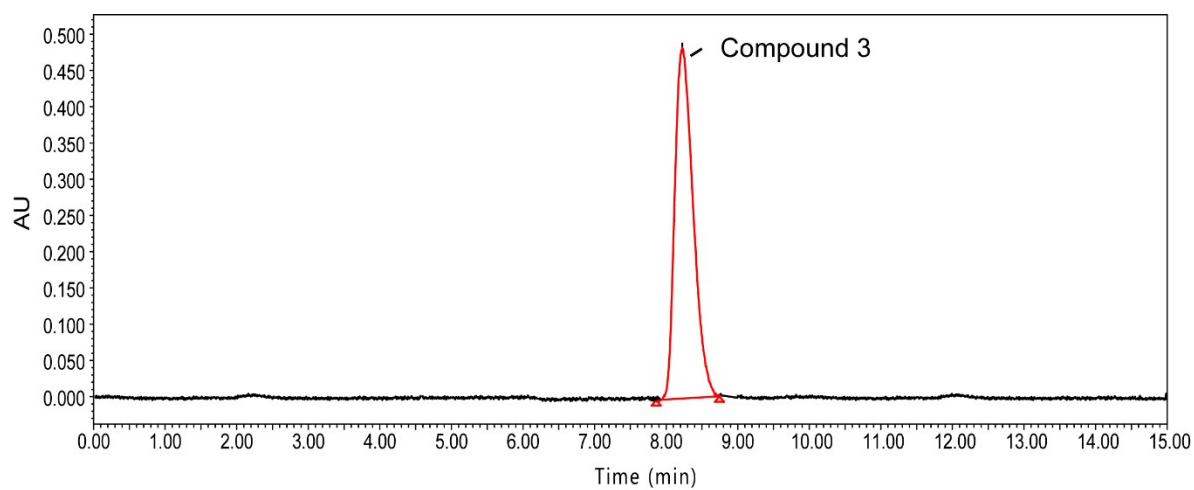

**Figure S20.** Purity test of compound 3 by HPLC ( $\lambda=210$  nm)

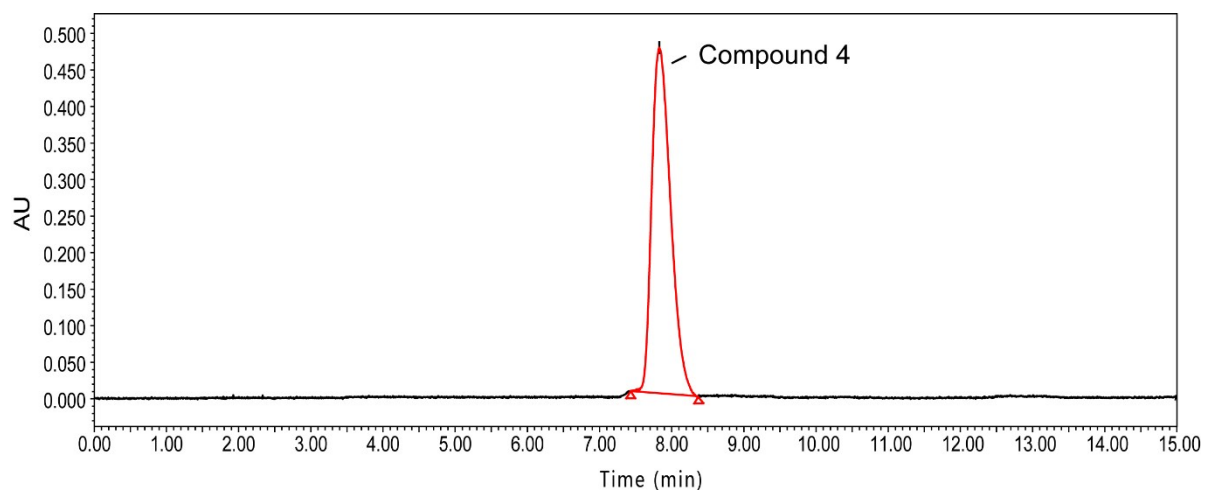

**Figure S21.** Purity test of compound 4 by HPLC ( $\lambda=210$  nm)

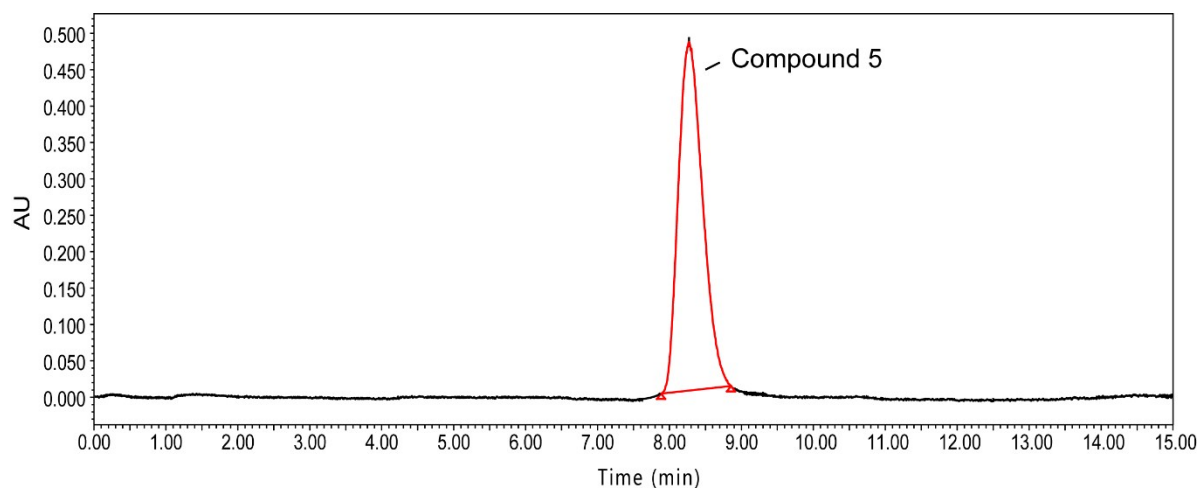

**Figure S22.** Purity test of compound 5 by HPLC ( $\lambda=210$  nm)

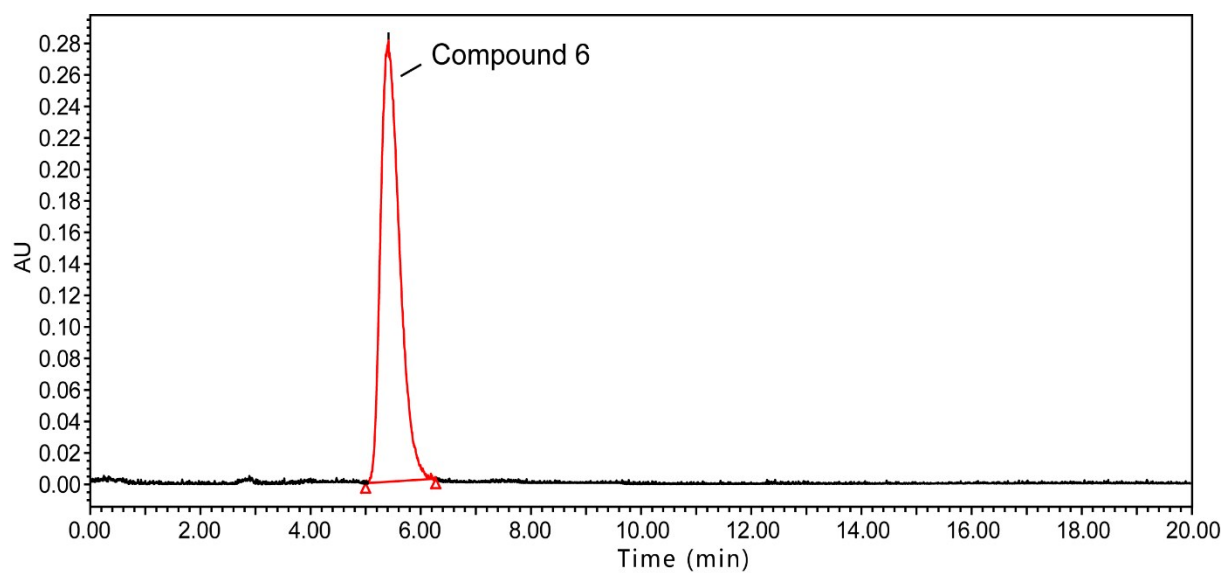

**Figure S23.** Purity test of compound 6 by HPLC ( $\lambda=210$  nm)

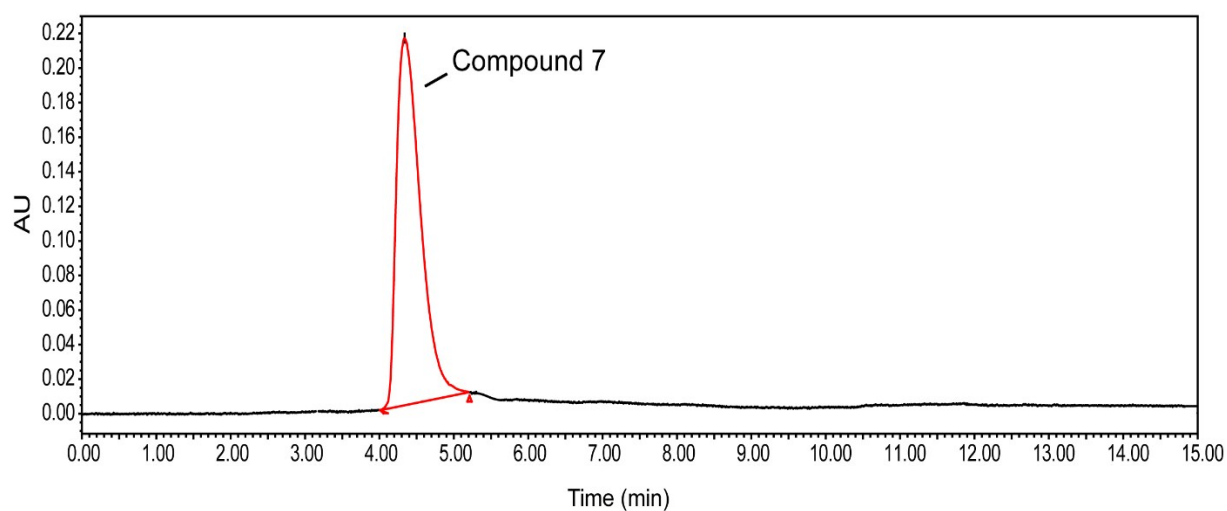

**Figure S24.** Purity test of compound 7 by HPLC ( $\lambda=210$  nm)

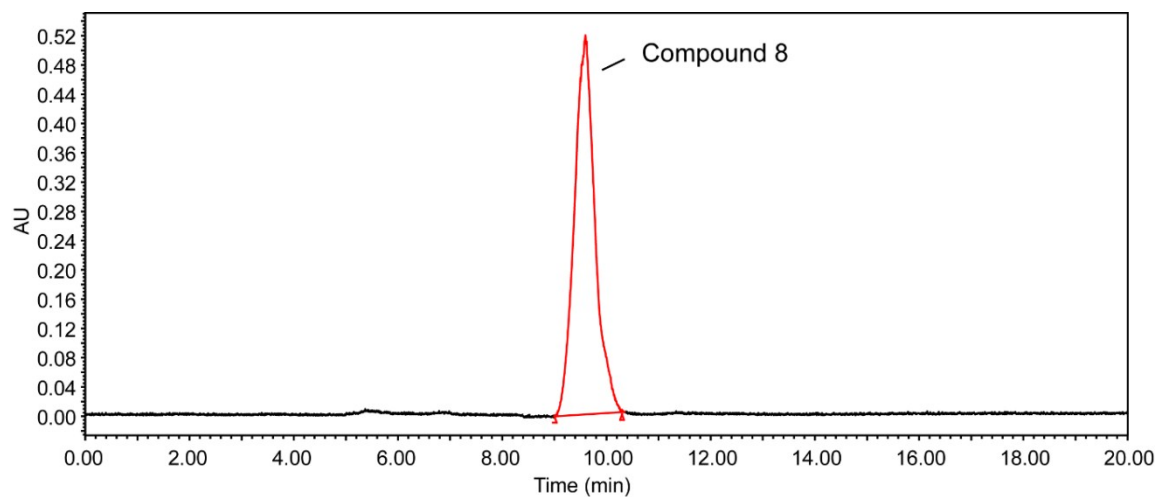

**Figure S25.** Purity test of compound 8 by HPLC ( $\lambda=210$  nm)

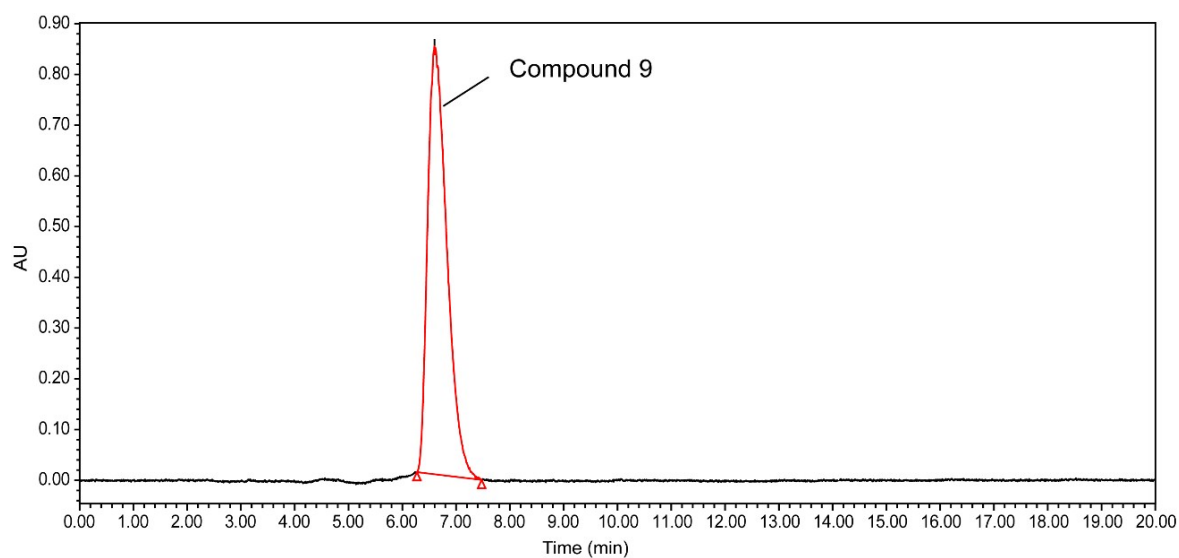

**Figure S26.** Purity test of compound 9 by HPLC ( $\lambda=210$  nm)

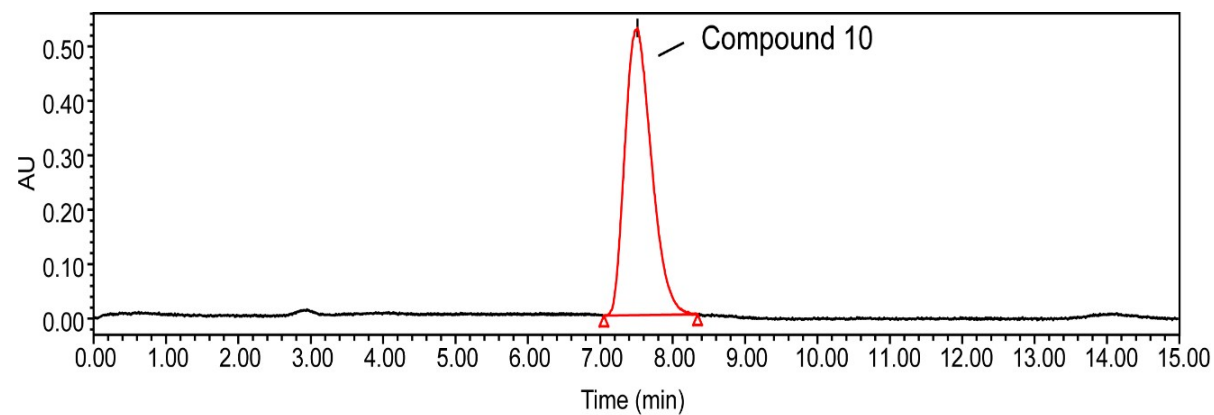

**Figure S27.** Purity test of compound 10 by HPLC ( $\lambda=210$  nm)

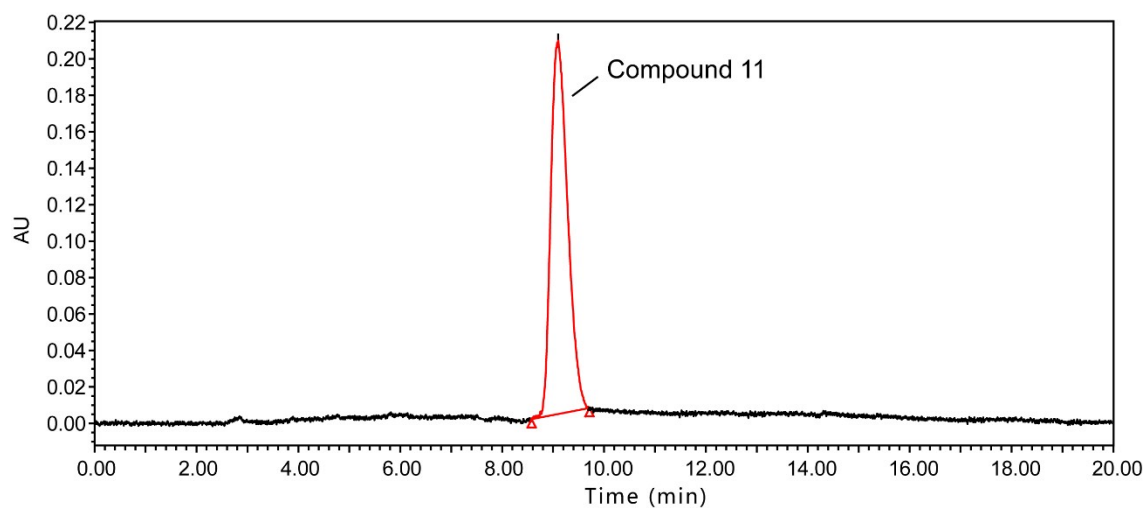

**Figure S28.** Purity test of compound 11 by HPLC ( $\lambda=210$  nm)

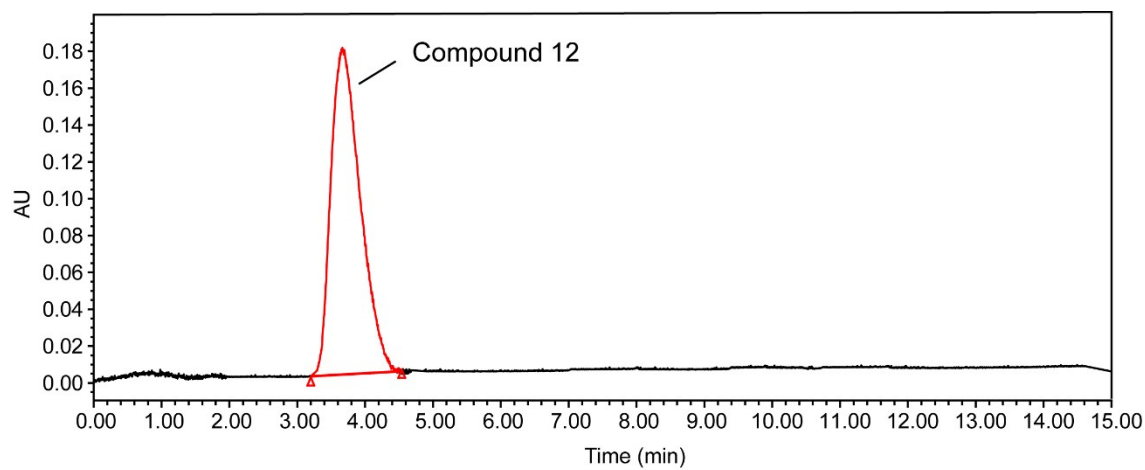

**Figure S29.** Purity test of compound 12 by HPLC ( $\lambda=210$  nm)

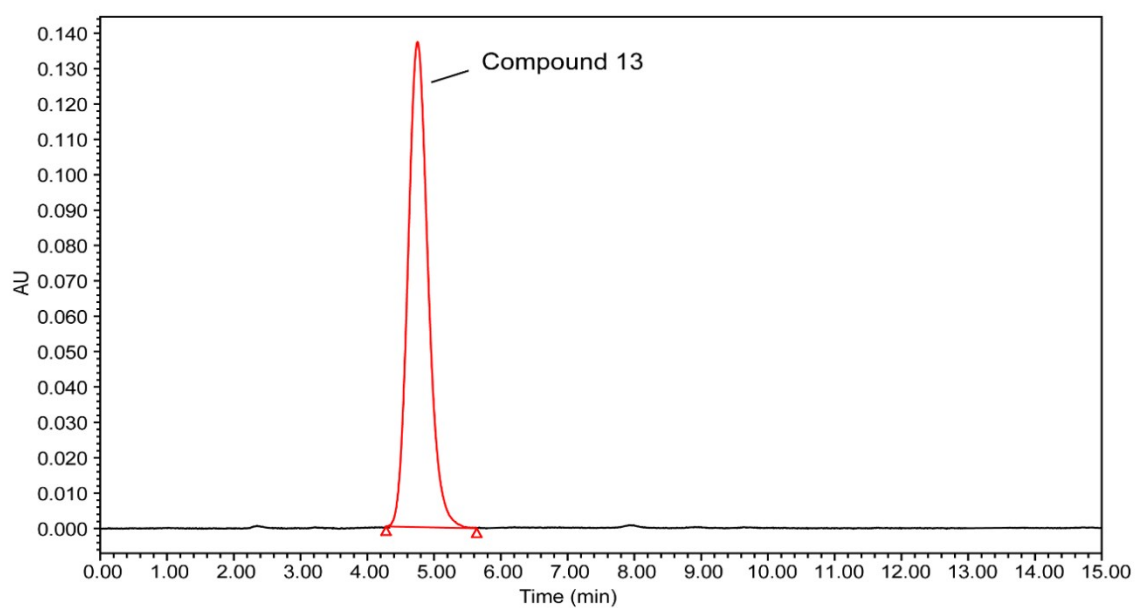

**Figure S30.** Purity test of compound 13 by HPLC ( $\lambda=210$  nm)



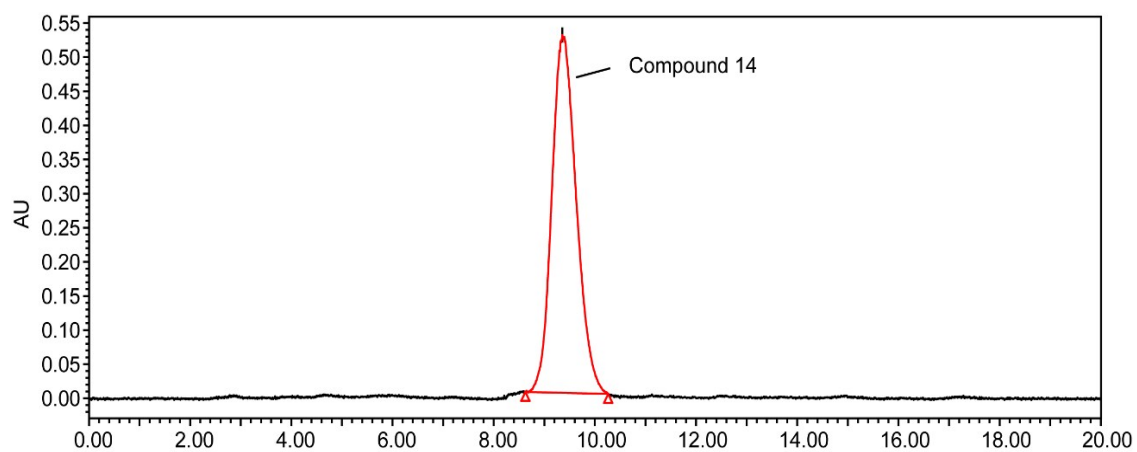

**Figure S31.** Purity test of compound 14 by HPLC ( $\lambda=210$  nm)

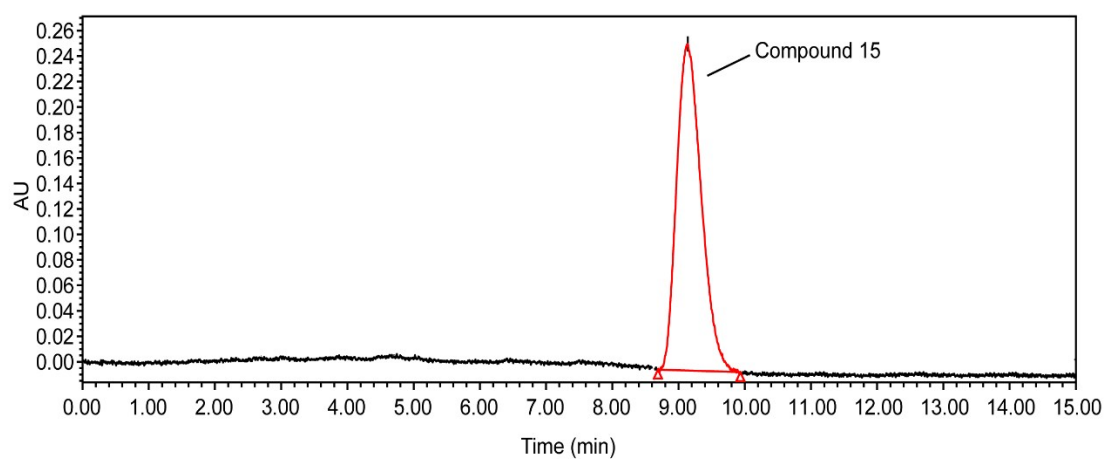

**Figure S32.** Purity test of compound 15 by HPLC ( $\lambda=210$  nm)

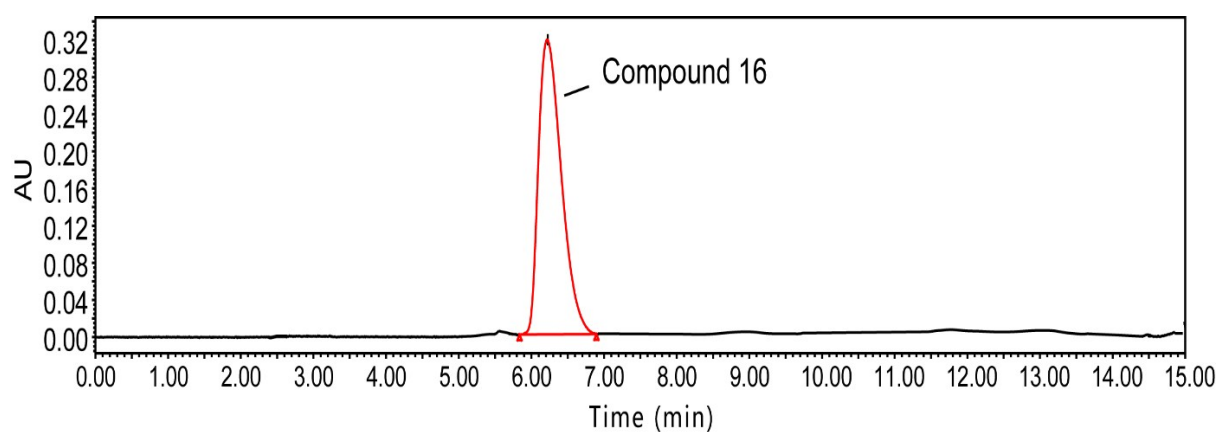

**Figure S33.** Purity test of compound 16 by HPLC ( $\lambda=210$  nm)

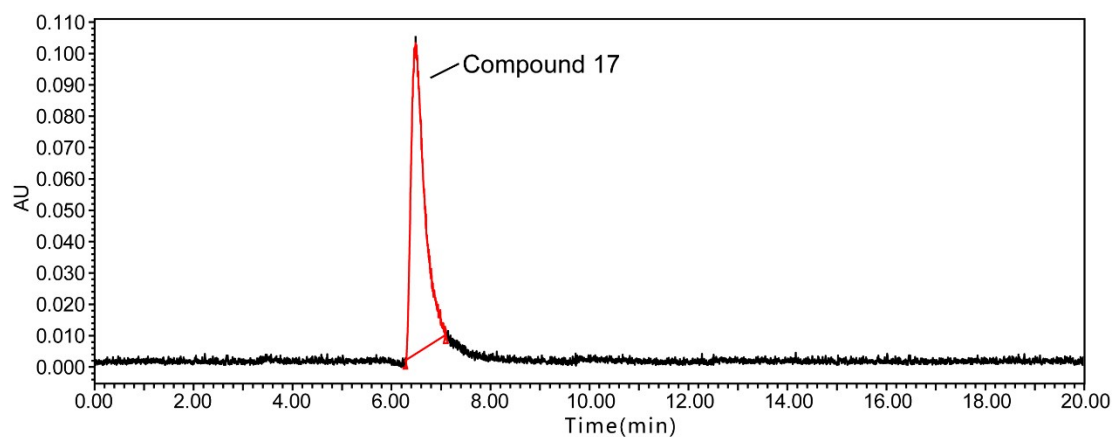

**Figure S34.** Purity test of compound 17 by HPLC ( $\lambda=210$  nm)

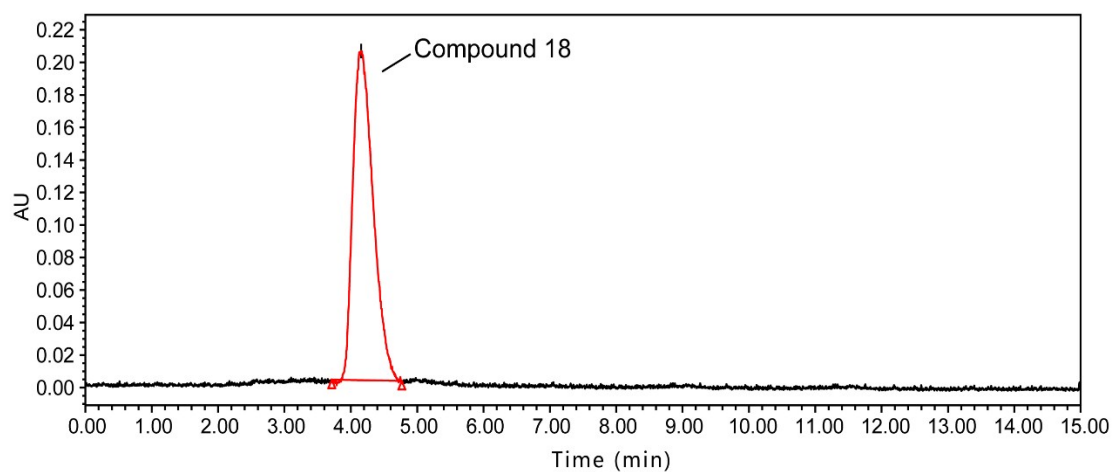

**Figure S35.** Purity test of compound 18 by HPLC ( $\lambda=210$  nm)

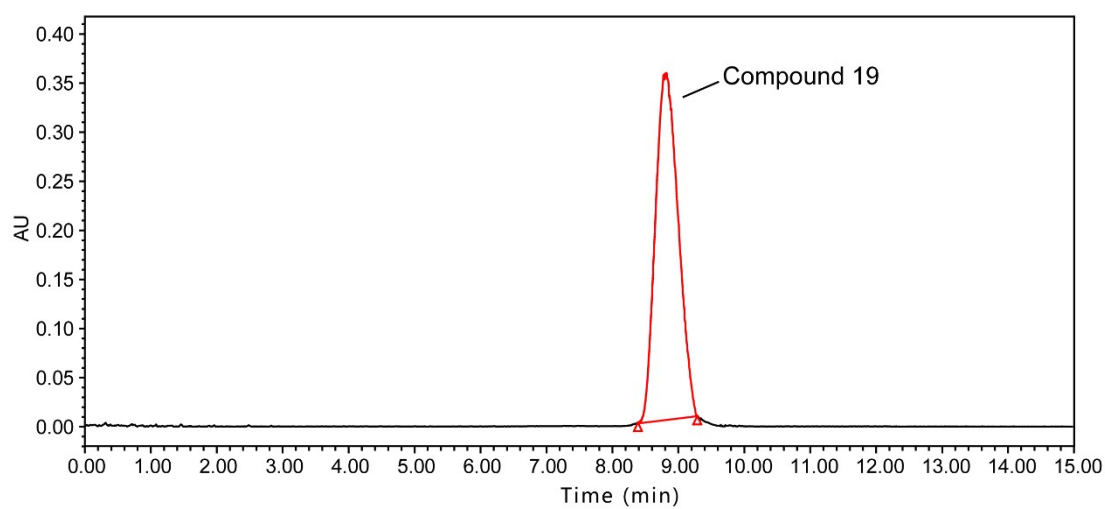

**Figure S36.** Purity test of compound 19 by HPLC ( $\lambda=210$  nm)

*Supplementary Information I (Tables)*

**Table S1.** Energies of the dominative conformers of **6** at MMFF94 force field.

| Configuration | Conformer | Energy (kcal/mol) | Population (%) |
|---------------|-----------|-------------------|----------------|
| a             | 1         | 110.44            | 67.51          |
|               | 2         | 111.18            | 19.18          |
|               | 3         | 111.77            | 7.16           |
|               | 4         | 112.40            | 2.47           |
| b             | 1         | 98.01             | 82.94          |
|               | 2         | 99.53             | 6.35           |
|               | 3         | 99.67             | 5.07           |

**Table S2.** Energies of the conformers of **6** at B3LYP/6-311G\*\* in methanol.

| Configuration | Conformation | Structure                                                                           | E (Hartree)  | E (kcal/mol) | Population (%) |
|---------------|--------------|-------------------------------------------------------------------------------------|--------------|--------------|----------------|
| a             | 1            | 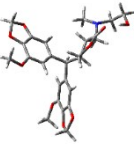   | -1702.250555 | -1068178.34  | 96.57          |
|               | 2            |    | -1702.246519 | -1068175.81  | 1.34           |
|               | 3            |   | -1702.243212 | -1068173.73  | 0.04           |
|               | 4            |  | -1702.246924 | -1068176.06  | 2.05           |
| b             | 1            |  | -1702.254118 | -1068180.58  | 5.54           |
|               | 2            |  | -1702.254164 | -1068180.61  | 5.82           |

---

3

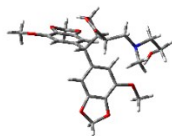

-1702.256079    -1068181.81    44.32

---

**Table S3.** the parameters of  $\sigma$  and UV-shift for each configuration of **6**

| Configuration | UV-shift value (nm) | $\sigma$ - shift value (eV) |
|---------------|---------------------|-----------------------------|
| a             | 0.36                | 10                          |
| b             | 0.36                | -1                          |
